# Supplementary material
Source: Elsevier journal article supplement (https://comptes-rendus.academie-sciences.fr/geoscience/article/10.1016/j.crte.2018.06.005/file/attach/mmc3.pdf)
Supplement: mmc3 [file mmc3.pdf]

| Number | $^{207}\text{Pb}^a$<br>(cps) | $\text{U}^b$<br>(ppm) | $\text{Pb}^b$<br>(ppm) | $\text{Th}^b$<br>U | $\frac{^{206}\text{Pb}^c}{^{204}\text{Pb}}$ | $\frac{^{206}\text{Pb}^c}{^{238}\text{U}}$ | $2\sigma$<br>% | $\frac{^{207}\text{Pb}^c}{^{235}\text{U}}$ | $2\sigma$<br>% | $\frac{^{207}\text{Pb}^c}{^{206}\text{Pb}}$ | $2\sigma$<br>% | rho <sup>d</sup> | $\frac{^{206}\text{Pb}}{^{238}\text{U}}$<br>(Ma) | $2\sigma$ | $\frac{^{207}\text{Pb}}{^{235}\text{U}}$<br>(Ma) | $2\sigma$ | $\frac{^{207}\text{Pb}}{^{206}\text{Pb}}$<br>(Ma) | $2\sigma$ | conc %     |   |
|--------|------------------------------|-----------------------|------------------------|--------------------|---------------------------------------------|--------------------------------------------|----------------|--------------------------------------------|----------------|---------------------------------------------|----------------|------------------|--------------------------------------------------|-----------|--------------------------------------------------|-----------|---------------------------------------------------|-----------|------------|---|
| F1-001 | 80941                        | 57                    | 27                     | 0.27               | 57548                                       | 0.42500                                    | 1.6            | 8.37961                                    | 1.7            | 0.14300                                     | 0.7            | 0.92             | 2283                                             | 30        | 2273                                             | 16        | 2264                                              | 12        | <b>101</b> |   |
| F1-002 | 39157                        | 27                    | 11                     | 0.29               | 28219                                       | 0.38972                                    | 3.9            | 7.54956                                    | 5.3            | 0.14050                                     | 3.6            | 0.73             | 2122                                             | 71        | 2179                                             | 49        | 2233                                              | 62        | <b>95</b>  |   |
| F1-003 | 89255                        | 72                    | 32                     | 0.33               | 66951                                       | 0.40964                                    | 1.6            | 7.65707                                    | 1.8            | 0.13557                                     | 0.9            | 0.88             | 2213                                             | 29        | 2192                                             | 16        | 2171                                              | 15        | <b>102</b> |   |
| F1-004 | -                            | -                     | -                      | -                  | -                                           | -                                          | -              | -                                          | -              | -                                           | -              | -                | -                                                | -         | -                                                | -         | -                                                 | -         | -          | - |
| F1-005 | 122264                       | 144                   | 30                     | 0.34               | 672                                         | 0.17287                                    | 5.2            | 3.13616                                    | 5.4            | 0.13158                                     | 1.2            | 0.98             | 1028                                             | 50        | 1442                                             | 42        | 2119                                              | 21        | 49         |   |
| F1-006 | 105822                       | 114                   | 15                     | 0.69               | 85035                                       | 0.07295                                    | 6.9            | 1.27298                                    | 7.0            | 0.12656                                     | 1.2            | 0.99             | 454                                              | 30        | 834                                              | 41        | 2051                                              | 20        | 22         |   |
| F1-007 | 171986                       | 222                   | 47                     | 0.26               | 406                                         | 0.17436                                    | 2.0            | 2.92245                                    | 2.6            | 0.12156                                     | 1.6            | 0.78             | 1036                                             | 20        | 1388                                             | 20        | 1979                                              | 29        | 52         |   |
| F1-008 | 197806                       | 285                   | 67                     | 0.38               | 410                                         | 0.20703                                    | 2.4            | 4.50795                                    | 2.8            | 0.15792                                     | 1.4            | 0.86             | 1213                                             | 27        | 1732                                             | 24        | 2434                                              | 24        | 50         |   |
| F1-009 | 49911                        | 42                    | 18                     | 0.36               | 37326                                       | 0.39247                                    | 1.8            | 7.35449                                    | 1.9            | 0.13591                                     | 0.8            | 0.90             | 2134                                             | 32        | 2155                                             | 17        | 2176                                              | 14        | <b>98</b>  |   |
| F1-010 | 78443                        | 113                   | 21                     | 0.34               | 420                                         | 0.14309                                    | 2.7            | 2.67537                                    | 3.1            | 0.13561                                     | 1.6            | 0.85             | 862                                              | 22        | 1322                                             | 23        | 2172                                              | 29        | 40         |   |
| F1-011 | -                            | -                     | -                      | -                  | -                                           | -                                          | -              | -                                          | -              | -                                           | -              | -                | -                                                | -         | -                                                | -         | -                                                 | -         | -          | - |
| F1-012 | 67942                        | 80                    | 26                     | 0.43               | 618                                         | 0.26351                                    | 1.8            | 5.65356                                    | 2.1            | 0.15560                                     | 1.1            | 0.84             | 1508                                             | 24        | 1924                                             | 18        | 2408                                              | 19        | 63         |   |
| F1-013 | 121870                       | 200                   | 39                     | 0.21               | 299                                         | 0.16481                                    | 4.0            | 2.96803                                    | 4.1            | 0.13061                                     | 0.8            | 0.98             | 983                                              | 37        | 1399                                             | 32        | 2106                                              | 14        | 47         |   |
| F1-014 | 155339                       | 191                   | 57                     | 0.19               | 6963                                        | 0.28062                                    | 4.5            | 5.01634                                    | 4.5            | 0.12965                                     | 0.8            | 0.98             | 1594                                             | 63        | 1822                                             | 39        | 2093                                              | 15        | 76         |   |
| F1-015 | 188991                       | 227                   | 43                     | 0.38               | 431                                         | 0.13487                                    | 6.6            | 2.44731                                    | 6.7            | 0.13160                                     | 1.3            | 0.98             | 816                                              | 51        | 1257                                             | 50        | 2119                                              | 23        | 38         |   |
| F1-016 | -                            | -                     | -                      | -                  | -                                           | -                                          | -              | -                                          | -              | -                                           | -              | -                | -                                                | -         | -                                                | -         | -                                                 | -         | -          | - |
| F1-017 | 37633                        | 56                    | 12                     | 0.84               | 219                                         | 0.16364                                    | 3.5            | 4.42527                                    | 4.5            | 0.19614                                     | 2.9            | 0.77             | 977                                              | 32        | 1717                                             | 38        | 2794                                              | 47        | 35         |   |
| F1-018 | 83908                        | 91                    | 37                     | 0.35               | 978                                         | 0.36719                                    | 2.2            | 6.74375                                    | 2.8            | 0.13320                                     | 1.8            | 0.77             | 2016                                             | 38        | 2078                                             | 25        | 2141                                              | 31        | <b>94</b>  |   |
| F1-019 | 143375                       | 164                   | 54                     | 0.17               | 1010                                        | 0.30281                                    | 2.2            | 5.96569                                    | 2.3            | 0.14289                                     | 0.7            | 0.95             | 1705                                             | 33        | 1971                                             | 20        | 2262                                              | 12        | 75         |   |
| F1-020 | 320435                       | 587                   | 73                     | 0.18               | 84                                          | 0.07164                                    | 5.3            | 2.70919                                    | 5.6            | 0.27428                                     | 1.8            | 0.95             | 446                                              | 23        | 1331                                             | 43        | 3331                                              | 28        | 13         |   |
| F1-021 | 908409                       | 2116                  | 227                    | 0.02               | 79                                          | 0.06008                                    | 2.6            | 2.46513                                    | 2.9            | 0.29757                                     | 1.3            | 0.90             | 376                                              | 10        | 1262                                             | 21        | 3458                                              | 20        | 11         |   |
| F1-022 | 112806                       | 104                   | 44                     | 0.35               | 86539                                       | 0.39556                                    | 1.6            | 7.24672                                    | 1.9            | 0.13287                                     | 1.1            | 0.83             | 2149                                             | 29        | 2142                                             | 17        | 2136                                              | 19        | <b>101</b> |   |
| F1-023 | 201291                       | 171                   | 80                     | 0.60               | 157252                                      | 0.39700                                    | 1.7            | 7.12475                                    | 1.8            | 0.13016                                     | 0.7            | 0.92             | 2155                                             | 31        | 2127                                             | 16        | 2100                                              | 13        | <b>103</b> |   |
| F1-024 | 121559                       | 263                   | 39                     | 0.10               | 228                                         | 0.12455                                    | 3.0            | 2.28493                                    | 3.3            | 0.13306                                     | 1.4            | 0.90             | 757                                              | 21        | 1208                                             | 24        | 2139                                              | 25        | 35         |   |
| F1-025 | 50141                        | 66                    | 18                     | 0.44               | 602                                         | 0.23523                                    | 2.7            | 5.04433                                    | 3.2            | 0.15553                                     | 1.7            | 0.84             | 1362                                             | 33        | 1827                                             | 28        | 2408                                              | 30        | 57         |   |
| F1-026 | 113499                       | 111                   | 41                     | 0.29               | 866                                         | 0.32555                                    | 1.9            | 5.81282                                    | 2.0            | 0.12950                                     | 0.8            | 0.91             | 1817                                             | 30        | 1948                                             | 18        | 2091                                              | 15        | 87         |   |
| F1-027 | 101428                       | 125                   | 34                     | 0.29               | 550                                         | 0.23525                                    | 2.1            | 5.03562                                    | 2.3            | 0.15524                                     | 0.9            | 0.91             | 1362                                             | 25        | 1825                                             | 19        | 2405                                              | 16        | 57         |   |
| F1-028 | 83497                        | 107                   | 30                     | 0.54               | 361                                         | 0.19329                                    | 1.9            | 4.48930                                    | 2.5            | 0.16845                                     | 1.5            | 0.79             | 1139                                             | 20        | 1729                                             | 21        | 2542                                              | 25        | 45         |   |
| F1-029 | 73730                        | 93                    | 25                     | 0.27               | 387                                         | 0.23591                                    | 2.2            | 5.23542                                    | 2.4            | 0.16095                                     | 1.0            | 0.92             | 1365                                             | 27        | 1858                                             | 21        | 2466                                              | 16        | 55         |   |
| F1-030 | 285665                       | 399                   | 86                     | 0.15               | 186                                         | 0.17524                                    | 2.7            | 2.79500                                    | 2.9            | 0.11568                                     | 1.2            | 0.91             | 1041                                             | 26        | 1354                                             | 22        | 1890                                              | 22        | 55         |   |

|          |        |     |    |      |        |         |      |         |      |         |     |      |      |    |      |    |      |    |            |   |
|----------|--------|-----|----|------|--------|---------|------|---------|------|---------|-----|------|------|----|------|----|------|----|------------|---|
| F1-031_1 | 60756  | 55  | 25 | 0.43 | 4641   | 0.39262 | 1.6  | 7.61997 | 1.8  | 0.14076 | 0.9 | 0.87 | 2135 | 29 | 2187 | 17 | 2237 | 16 | <b>95</b>  |   |
| F1-032_1 | 285438 | 313 | 36 | 0.32 | 316    | 0.05554 | 14.5 | 0.95592 | 14.7 | 0.12483 | 2.7 | 0.98 | 348  | 49 | 681  | 76 | 2026 | 48 | 17         |   |
| F1-033_1 | -      | -   | -  | -    | -      | -       | -    | -       | -    | -       | -   | -    | -    | -  | -    | -  | -    | -  | -          | - |
| F1-031_2 | 38360  | 30  | 13 | 0.37 | 3971   | 0.39606 | 1.8  | 7.74339 | 2.6  | 0.14180 | 1.9 | 0.70 | 2151 | 34 | 2202 | 24 | 2249 | 32 | <b>96</b>  |   |
| F1-032_2 | 112467 | 99  | 44 | 0.46 | 59847  | 0.38921 | 1.7  | 7.10100 | 1.8  | 0.13232 | 0.5 | 0.96 | 2119 | 31 | 2124 | 16 | 2129 | 9  | <b>100</b> |   |
| F1-033_2 | 94267  | 85  | 37 | 0.36 | 2449   | 0.38778 | 1.9  | 7.17705 | 2.1  | 0.13423 | 0.9 | 0.90 | 2113 | 34 | 2134 | 19 | 2154 | 16 | <b>98</b>  |   |
| F1-034   | 40400  | 38  | 9  | 0.17 | 828    | 0.20384 | 4.4  | 4.54326 | 5.1  | 0.16165 | 2.6 | 0.86 | 1196 | 48 | 1739 | 44 | 2473 | 44 | 48         |   |
| F1-035   | 76117  | 58  | 26 | 0.26 | 56888  | 0.41782 | 1.6  | 7.85080 | 1.9  | 0.13628 | 1.0 | 0.86 | 2251 | 31 | 2214 | 17 | 2180 | 17 | <b>103</b> |   |
| F1-036   | 100449 | 87  | 36 | 0.41 | 3006   | 0.36143 | 1.8  | 6.74309 | 2.0  | 0.13531 | 0.8 | 0.91 | 1989 | 31 | 2078 | 18 | 2168 | 14 | <b>92</b>  |   |
| F1-037   | 206119 | 256 | 65 | 0.48 | 726    | 0.20635 | 3.9  | 3.96633 | 4.2  | 0.13941 | 1.6 | 0.93 | 1209 | 43 | 1627 | 34 | 2220 | 27 | 54         |   |
| F1-038   | 61616  | 51  | 23 | 0.37 | 45862  | 0.40368 | 1.7  | 7.60511 | 1.9  | 0.13664 | 0.8 | 0.90 | 2186 | 32 | 2185 | 18 | 2185 | 15 | <b>100</b> |   |
| F1-039   | 102083 | 87  | 39 | 0.32 | 76600  | 0.40754 | 1.6  | 7.61644 | 1.9  | 0.13554 | 1.0 | 0.86 | 2204 | 31 | 2187 | 17 | 2171 | 17 | <b>102</b> |   |
| F1-040   | 82016  | 71  | 32 | 0.42 | 61750  | 0.40031 | 1.7  | 7.45595 | 1.8  | 0.13508 | 0.7 | 0.92 | 2170 | 31 | 2168 | 17 | 2165 | 13 | <b>100</b> |   |
| F1-041   | 192599 | 417 | 59 | 0.32 | 268    | 0.11357 | 3.6  | 1.97535 | 3.8  | 0.12615 | 1.1 | 0.96 | 693  | 24 | 1107 | 26 | 2045 | 19 | 34         |   |
| F1-042   | 167729 | 191 | 50 | 0.50 | 314    | 0.19982 | 2.1  | 4.86114 | 2.6  | 0.17644 | 1.4 | 0.83 | 1174 | 23 | 1796 | 22 | 2620 | 24 | 45         |   |
| F1-043   | 101188 | 92  | 41 | 0.44 | 77340  | 0.39474 | 1.6  | 7.24168 | 1.9  | 0.13305 | 0.9 | 0.86 | 2145 | 29 | 2142 | 17 | 2139 | 16 | <b>100</b> |   |
| F1-044   | 124947 | 144 | 43 | 0.52 | 611    | 0.26373 | 6.9  | 4.74960 | 7.3  | 0.13062 | 2.3 | 0.95 | 1509 | 94 | 1776 | 63 | 2106 | 40 | 72         |   |
| F1-045   | 168950 | 169 | 76 | 0.64 | 133731 | 0.38324 | 1.7  | 6.79644 | 2.0  | 0.12862 | 1.0 | 0.87 | 2091 | 31 | 2085 | 18 | 2079 | 17 | <b>101</b> |   |
| F1-046   | 101416 | 89  | 35 | 0.24 | 41646  | 0.36219 | 1.8  | 6.82627 | 2.1  | 0.13669 | 1.0 | 0.87 | 1993 | 31 | 2089 | 19 | 2186 | 18 | <b>91</b>  |   |
| F1-047   | 159984 | 149 | 56 | 0.22 | 1027   | 0.34935 | 1.9  | 6.34235 | 2.1  | 0.13167 | 0.8 | 0.93 | 1931 | 32 | 2024 | 18 | 2120 | 14 | <b>91</b>  |   |
| F1-048   | 180350 | 354 | 45 | 0.19 | 253    | 0.09879 | 2.8  | 1.60677 | 3.3  | 0.11797 | 1.7 | 0.86 | 607  | 16 | 973  | 21 | 1926 | 30 | 32         |   |
| F1-049   | 130433 | 142 | 45 | 1.05 | 828    | 0.27849 | 1.6  | 5.64562 | 1.8  | 0.14703 | 0.8 | 0.89 | 1584 | 22 | 1923 | 15 | 2312 | 14 | 69         |   |
| F1-050   | 126467 | 186 | 26 | 0.21 | 487    | 0.10658 | 3.4  | 1.74219 | 4.5  | 0.11856 | 2.9 | 0.76 | 653  | 21 | 1024 | 29 | 1935 | 52 | 34         |   |
| F1-051   | 280218 | 579 | 97 | 0.19 | 196    | 0.14253 | 2.1  | 2.15466 | 2.6  | 0.10964 | 1.5 | 0.81 | 859  | 17 | 1167 | 18 | 1793 | 27 | 48         |   |
| F1-052   | 68044  | 82  | 25 | 0.61 | 299    | 0.25009 | 2.3  | 6.01387 | 2.7  | 0.17440 | 1.5 | 0.83 | 1439 | 30 | 1978 | 24 | 2600 | 25 | 55         |   |
| F1-053   | 51617  | 42  | 19 | 0.37 | 38224  | 0.40584 | 1.7  | 7.68707 | 1.8  | 0.13737 | 0.8 | 0.91 | 2196 | 31 | 2195 | 17 | 2194 | 14 | <b>100</b> |   |
| F1-054   | 224035 | 323 | 75 | 0.22 | 219    | 0.18861 | 3.2  | 3.17930 | 3.6  | 0.12226 | 1.6 | 0.89 | 1114 | 33 | 1452 | 28 | 1989 | 29 | 56         |   |
| F1-055   | 66418  | 58  | 25 | 0.32 | 50291  | 0.38910 | 1.6  | 7.20745 | 1.9  | 0.13434 | 0.9 | 0.88 | 2119 | 29 | 2137 | 17 | 2156 | 15 | <b>98</b>  |   |
| F1-056   | 33455  | 54  | 10 | 0.23 | 364    | 0.14412 | 5.5  | 3.28088 | 5.8  | 0.16510 | 1.8 | 0.95 | 868  | 45 | 1477 | 46 | 2509 | 31 | 35         |   |
| F1-057   | 125884 | 106 | 47 | 0.45 | 2846   | 0.38698 | 2.0  | 7.29825 | 2.5  | 0.13678 | 1.5 | 0.79 | 2109 | 36 | 2149 | 23 | 2187 | 27 | <b>96</b>  |   |
| F1-058   | 75669  | 71  | 26 | 0.27 | 1572   | 0.33948 | 1.9  | 6.54744 | 2.0  | 0.13988 | 0.8 | 0.93 | 1884 | 30 | 2052 | 18 | 2226 | 13 | 85         |   |
| F1-059   | 42808  | 36  | 15 | 0.26 | 23574  | 0.39624 | 1.6  | 7.38500 | 1.9  | 0.13517 | 1.0 | 0.84 | 2152 | 30 | 2159 | 17 | 2166 | 18 | <b>99</b>  |   |
| F1-060   | 70675  | 60  | 27 | 0.39 | 53745  | 0.39693 | 1.7  | 7.32020 | 1.9  | 0.13375 | 0.8 | 0.91 | 2155 | 31 | 2151 | 17 | 2148 | 13 | <b>100</b> |   |

|        |        |     |     |      |       |         |     |         |     |         |     |      |      |    |      |    |      |    |            |
|--------|--------|-----|-----|------|-------|---------|-----|---------|-----|---------|-----|------|------|----|------|----|------|----|------------|
| F1-061 | 230870 | 233 | 96  | 0.50 | 800   | 0.36117 | 2.9 | 6.35564 | 3.1 | 0.12763 | 1.0 | 0.94 | 1988 | 50 | 2026 | 27 | 2066 | 18 | <b>96</b>  |
| F1-062 | 124218 | 103 | 44  | 0.25 | 94113 | 0.39596 | 1.7 | 7.33047 | 2.0 | 0.13427 | 1.0 | 0.87 | 2150 | 32 | 2153 | 18 | 2155 | 17 | <b>100</b> |
| F1-063 | 11257  | 8   | 3   | 0.05 | 1699  | 0.36240 | 2.6 | 7.18631 | 3.4 | 0.14382 | 2.1 | 0.78 | 1994 | 45 | 2135 | 30 | 2274 | 36 | 88         |
| F1-064 | 182316 | 229 | 53  | 0.24 | 473   | 0.19618 | 2.2 | 3.28623 | 2.6 | 0.12149 | 1.3 | 0.86 | 1155 | 23 | 1478 | 20 | 1978 | 23 | 58         |
| F1-065 | 223142 | 359 | 53  | 0.25 | 167   | 0.10291 | 4.1 | 2.96286 | 4.3 | 0.20881 | 1.2 | 0.96 | 631  | 25 | 1398 | 33 | 2896 | 20 | 22         |
| F1-066 | 211588 | 258 | 79  | 0.26 | 4101  | 0.28242 | 1.9 | 4.83744 | 2.0 | 0.12423 | 0.6 | 0.95 | 1604 | 27 | 1791 | 17 | 2018 | 11 | 79         |
| F1-067 | 82806  | 80  | 30  | 0.14 | 2929  | 0.35823 | 2.0 | 6.71827 | 2.2 | 0.13602 | 1.0 | 0.90 | 1974 | 35 | 2075 | 20 | 2177 | 17 | <b>91</b>  |
| F1-068 | 148717 | 151 | 58  | 0.51 | 522   | 0.31796 | 1.6 | 6.77956 | 1.9 | 0.15464 | 1.0 | 0.85 | 1780 | 25 | 2083 | 17 | 2398 | 17 | 74         |
| F1-069 | 31094  | 24  | 12  | 0.34 | 24340 | 0.47843 | 1.6 | 8.57041 | 2.1 | 0.12992 | 1.4 | 0.73 | 2520 | 33 | 2293 | 20 | 2097 | 25 | 120        |
| F1-070 | 65050  | 63  | 25  | 0.26 | 1122  | 0.37103 | 1.6 | 6.62005 | 2.0 | 0.12941 | 1.3 | 0.77 | 2034 | 28 | 2062 | 18 | 2090 | 23 | <b>97</b>  |
| F1-071 | 108031 | 88  | 40  | 0.25 | 5354  | 0.41720 | 1.5 | 8.12478 | 1.8 | 0.14124 | 0.9 | 0.86 | 2248 | 29 | 2245 | 16 | 2242 | 16 | <b>100</b> |
| F1-072 | 68091  | 62  | 22  | 0.29 | 1549  | 0.31067 | 2.0 | 5.98143 | 2.3 | 0.13964 | 1.1 | 0.89 | 1744 | 31 | 1973 | 20 | 2223 | 18 | 78         |
| F1-073 | 567504 | 941 | 155 | 0.04 | 97    | 0.11348 | 1.9 | 1.74141 | 2.5 | 0.11130 | 1.6 | 0.76 | 693  | 12 | 1024 | 16 | 1821 | 29 | 38         |
| F1-074 | 158435 | 159 | 71  | 0.58 | 3607  | 0.39028 | 2.2 | 7.17636 | 2.3 | 0.13336 | 0.8 | 0.94 | 2124 | 40 | 2134 | 21 | 2143 | 14 | <b>99</b>  |
| F1-075 | 178513 | 262 | 82  | 0.44 | 749   | 0.28055 | 3.6 | 5.46238 | 3.8 | 0.14121 | 1.0 | 0.96 | 1594 | 51 | 1895 | 33 | 2242 | 18 | 71         |
| F1-076 | 97829  | 190 | 25  | 0.20 | 192   | 0.10066 | 5.6 | 1.85867 | 6.5 | 0.13392 | 3.3 | 0.86 | 618  | 33 | 1067 | 44 | 2150 | 58 | 29         |
| F1-077 | 254145 | 315 | 91  | 0.32 | 509   | 0.25413 | 1.7 | 4.27693 | 2.0 | 0.12206 | 1.0 | 0.88 | 1460 | 23 | 1689 | 16 | 1987 | 17 | 73         |
| F1-078 | 153699 | 180 | 48  | 0.19 | 364   | 0.21750 | 2.9 | 5.19482 | 3.0 | 0.17323 | 0.8 | 0.97 | 1269 | 34 | 1852 | 26 | 2589 | 13 | 49         |
| F1-079 | 129378 | 199 | 52  | 0.34 | 533   | 0.23184 | 2.6 | 4.19565 | 3.0 | 0.13126 | 1.6 | 0.84 | 1344 | 31 | 1673 | 25 | 2115 | 29 | 64         |
| F1-080 | 181357 | 317 | 59  | 0.23 | 368   | 0.15257 | 3.3 | 3.18709 | 3.5 | 0.15150 | 1.3 | 0.93 | 915  | 28 | 1454 | 28 | 2363 | 21 | 39         |
| F1-081 | 148116 | 118 | 44  | 0.45 | 5305  | 0.32030 | 2.1 | 6.24351 | 2.3 | 0.14137 | 0.8 | 0.94 | 1791 | 33 | 2011 | 20 | 2244 | 13 | 80         |
| F1-082 | 198182 | 204 | 87  | 0.55 | 5365  | 0.36547 | 1.5 | 6.32966 | 1.7 | 0.12561 | 0.7 | 0.92 | 2008 | 26 | 2023 | 15 | 2037 | 12 | <b>99</b>  |
| F1-083 | 90246  | 99  | 35  | 0.32 | 1189  | 0.29923 | 1.7 | 6.02445 | 1.9 | 0.14602 | 0.7 | 0.93 | 1687 | 26 | 1979 | 17 | 2300 | 12 | 73         |
| F1-084 | 43974  | 41  | 18  | 0.25 | 3049  | 0.40762 | 1.8 | 7.75784 | 2.3 | 0.13803 | 1.5 | 0.77 | 2204 | 34 | 2203 | 21 | 2203 | 26 | <b>100</b> |
| F1-085 | 99031  | 90  | 35  | 0.31 | 2181  | 0.35117 | 1.6 | 6.91407 | 1.9 | 0.14279 | 1.0 | 0.85 | 1940 | 27 | 2100 | 17 | 2261 | 17 | 86         |
| F1-086 | 82184  | 78  | 34  | 0.41 | 1478  | 0.38748 | 2.0 | 7.73463 | 2.2 | 0.14477 | 1.0 | 0.89 | 2111 | 35 | 2201 | 20 | 2285 | 17 | <b>92</b>  |
| F1-087 | 76808  | 134 | 26  | 0.19 | 424   | 0.16561 | 2.9 | 3.86866 | 2.9 | 0.16943 | 0.6 | 0.98 | 988  | 26 | 1607 | 24 | 2552 | 11 | 39         |
| F1-088 | 183619 | 233 | 78  | 0.29 | 742   | 0.29848 | 2.6 | 5.88499 | 2.9 | 0.14300 | 1.2 | 0.91 | 1684 | 39 | 1959 | 25 | 2264 | 20 | 74         |
| F1-089 | 61796  | 54  | 24  | 0.39 | 46779 | 0.39863 | 1.6 | 7.38315 | 1.9 | 0.13433 | 0.9 | 0.88 | 2163 | 30 | 2159 | 17 | 2155 | 15 | <b>100</b> |
| F1-090 | 88099  | 79  | 33  | 0.33 | 68311 | 0.38529 | 1.8 | 6.96655 | 2.0 | 0.13114 | 0.8 | 0.92 | 2101 | 32 | 2107 | 17 | 2113 | 14 | <b>99</b>  |
| F1-091 | 100210 | 129 | 38  | 0.29 | 3234  | 0.26257 | 2.2 | 4.58944 | 2.4 | 0.12677 | 0.8 | 0.94 | 1503 | 30 | 1747 | 20 | 2054 | 14 | 73         |
| F1-092 | 77282  | 68  | 30  | 0.34 | 58293 | 0.39702 | 1.7 | 7.37390 | 1.9 | 0.13470 | 0.9 | 0.89 | 2155 | 32 | 2158 | 17 | 2160 | 15 | <b>100</b> |
| F1-093 | 124911 | 111 | 49  | 0.51 | 46349 | 0.38460 | 1.6 | 6.94977 | 1.7 | 0.13106 | 0.6 | 0.93 | 2098 | 29 | 2105 | 16 | 2112 | 11 | <b>99</b>  |

|        |        |     |     |      |       |         |     |         |     |         |     |      |      |    |      |    |      |    |            |
|--------|--------|-----|-----|------|-------|---------|-----|---------|-----|---------|-----|------|------|----|------|----|------|----|------------|
| F1-094 | 119321 | 133 | 57  | 0.38 | 1503  | 0.38883 | 1.9 | 7.35182 | 2.2 | 0.13713 | 1.1 | 0.86 | 2117 | 35 | 2155 | 20 | 2191 | 20 | <b>97</b>  |
| F1-095 | 102208 | 93  | 26  | 0.32 | 2359  | 0.23363 | 2.8 | 4.38545 | 3.0 | 0.13614 | 0.9 | 0.96 | 1353 | 35 | 1710 | 25 | 2179 | 15 | 62         |
| F1-096 | 104769 | 91  | 40  | 0.36 | 25763 | 0.39431 | 1.6 | 7.41366 | 1.7 | 0.13636 | 0.6 | 0.94 | 2143 | 29 | 2163 | 15 | 2181 | 10 | <b>98</b>  |
| F1-097 | 89956  | 89  | 36  | 0.25 | 1788  | 0.37604 | 1.6 | 7.20480 | 1.9 | 0.13896 | 0.9 | 0.86 | 2058 | 28 | 2137 | 17 | 2214 | 16 | <b>93</b>  |
| F1-098 | 65288  | 63  | 23  | 0.26 | 2273  | 0.33747 | 1.6 | 5.94468 | 2.0 | 0.12776 | 1.1 | 0.82 | 1874 | 26 | 1968 | 17 | 2067 | 20 | <b>91</b>  |
| F1-099 | 108835 | 98  | 44  | 0.58 | 5905  | 0.38072 | 1.7 | 7.14340 | 1.8 | 0.13608 | 0.7 | 0.92 | 2080 | 30 | 2129 | 16 | 2178 | 12 | <b>95</b>  |
| F1-100 | 56319  | 48  | 22  | 0.44 | 5743  | 0.40305 | 1.6 | 7.57214 | 1.9 | 0.13626 | 0.9 | 0.87 | 2183 | 31 | 2182 | 17 | 2180 | 16 | <b>100</b> |
| F1-101 | 127353 | 112 | 49  | 0.45 | 17397 | 0.38615 | 1.8 | 7.07937 | 1.9 | 0.13296 | 0.7 | 0.93 | 2105 | 32 | 2121 | 17 | 2137 | 12 | <b>98</b>  |
| F1-102 | 254814 | 578 | 58  | 0.08 | 120   | 0.06724 | 3.9 | 1.20561 | 4.5 | 0.13004 | 2.2 | 0.87 | 420  | 16 | 803  | 25 | 2099 | 39 | 20         |
| F1-103 | 88291  | 85  | 32  | 0.29 | 5498  | 0.35024 | 1.7 | 6.33097 | 2.0 | 0.13110 | 1.0 | 0.86 | 1936 | 28 | 2023 | 17 | 2113 | 18 | <b>92</b>  |
| F1-104 | 195493 | 426 | 73  | 0.15 | 243   | 0.14900 | 4.2 | 2.50866 | 4.6 | 0.12211 | 2.0 | 0.90 | 895  | 35 | 1275 | 34 | 1987 | 36 | 45         |
| F1-105 | 551074 | 819 | 149 | 0.04 | 90    | 0.11262 | 1.8 | 4.42982 | 2.3 | 0.28527 | 1.3 | 0.81 | 688  | 12 | 1718 | 19 | 3392 | 20 | 20         |
| F1-106 | 239480 | 232 | 93  | 0.39 | 1749  | 0.35664 | 1.6 | 6.25103 | 1.8 | 0.12712 | 0.9 | 0.89 | 1966 | 28 | 2012 | 16 | 2059 | 15 | <b>96</b>  |
| F1-107 | 140305 | 785 | 71  | 0.14 | 212   | 0.08204 | 1.8 | 0.68837 | 3.4 | 0.06086 | 2.9 | 0.53 | 508  | 9  | 532  | 14 | 634  | 63 | 80         |
| F1-108 | 187259 | 191 | 63  | 0.21 | 1546  | 0.30198 | 1.7 | 5.89788 | 1.8 | 0.14165 | 0.7 | 0.91 | 1701 | 25 | 1961 | 16 | 2247 | 13 | 76         |
| F1-109 | 110390 | 149 | 36  | 0.37 | 1152  | 0.20354 | 2.4 | 3.54142 | 2.6 | 0.12619 | 1.0 | 0.92 | 1194 | 27 | 1537 | 21 | 2046 | 18 | 58         |
| F1-110 | 60141  | 50  | 23  | 0.49 | 18319 | 0.39393 | 1.7 | 7.43112 | 2.0 | 0.13682 | 1.0 | 0.88 | 2141 | 32 | 2165 | 18 | 2187 | 17 | <b>98</b>  |
| F1-111 | 108065 | 105 | 41  | 0.20 | 2195  | 0.36377 | 2.2 | 6.84589 | 2.3 | 0.13649 | 0.5 | 0.98 | 2000 | 38 | 2092 | 20 | 2183 | 8  | <b>92</b>  |
| F1-112 | 27172  | 24  | 10  | 0.26 | 13396 | 0.38563 | 1.8 | 7.33854 | 2.1 | 0.13802 | 1.1 | 0.86 | 2103 | 33 | 2154 | 19 | 2202 | 19 | <b>95</b>  |
| F1-113 | 202455 | 259 | 55  | 0.23 | 404   | 0.17477 | 2.0 | 3.61893 | 2.4 | 0.15018 | 1.3 | 0.84 | 1038 | 19 | 1554 | 19 | 2348 | 22 | 44         |
| F1-114 | 158341 | 147 | 58  | 0.60 | 2329  | 0.33389 | 1.9 | 6.17249 | 2.1 | 0.13408 | 0.8 | 0.93 | 1857 | 31 | 2001 | 18 | 2152 | 14 | 86         |
| F1-115 | 81095  | 70  | 31  | 0.43 | 3350  | 0.38270 | 1.7 | 7.05260 | 1.9 | 0.13366 | 0.9 | 0.87 | 2089 | 30 | 2118 | 17 | 2147 | 16 | <b>97</b>  |
| F1-116 | 648848 | 857 | 173 | 0.14 | 83    | 0.12115 | 2.2 | 4.95830 | 2.7 | 0.29682 | 1.5 | 0.84 | 737  | 16 | 1812 | 23 | 3454 | 23 | 21         |
| F1-117 | 112576 | 105 | 35  | 0.28 | 553   | 0.28851 | 2.5 | 6.23795 | 2.8 | 0.15681 | 1.3 | 0.89 | 1634 | 36 | 2010 | 25 | 2422 | 22 | 67         |
| F1-118 | 142828 | 125 | 54  | 0.39 | 87140 | 0.38995 | 1.7 | 7.07953 | 1.8 | 0.13167 | 0.5 | 0.95 | 2123 | 31 | 2121 | 16 | 2120 | 9  | <b>100</b> |
| F1-119 | 137490 | 202 | 51  | 0.59 | 155   | 0.19201 | 2.2 | 5.58152 | 2.8 | 0.21083 | 1.7 | 0.80 | 1132 | 23 | 1913 | 24 | 2912 | 27 | 39         |
| F1-120 | 67524  | 60  | 24  | 0.20 | 15605 | 0.37967 | 1.8 | 7.09913 | 1.9 | 0.13561 | 0.8 | 0.92 | 2075 | 32 | 2124 | 17 | 2172 | 13 | <b>96</b>  |
| F1-121 | 48475  | 42  | 18  | 0.35 | 16866 | 0.39070 | 1.5 | 7.19801 | 1.8 | 0.13362 | 1.0 | 0.85 | 2126 | 28 | 2136 | 16 | 2146 | 17 | <b>99</b>  |
| F1-122 | 41436  | 36  | 15  | 0.43 | 31301 | 0.38362 | 1.0 | 7.12176 | 1.5 | 0.13464 | 1.1 | 0.69 | 2093 | 18 | 2127 | 13 | 2159 | 19 | <b>97</b>  |
| F1-123 | 63948  | 54  | 23  | 0.19 | 12879 | 0.40029 | 1.4 | 7.40005 | 1.6 | 0.13408 | 0.8 | 0.87 | 2170 | 25 | 2161 | 14 | 2152 | 13 | <b>101</b> |
| F1-124 | 156112 | 198 | 57  | 0.24 | 305   | 0.25426 | 1.7 | 4.87718 | 2.3 | 0.13912 | 1.6 | 0.74 | 1460 | 23 | 1798 | 20 | 2216 | 27 | 66         |
| F1-125 | 82844  | 66  | 30  | 0.47 | 7880  | 0.38504 | 1.9 | 6.99891 | 2.0 | 0.13183 | 0.8 | 0.93 | 2100 | 34 | 2111 | 18 | 2123 | 13 | <b>99</b>  |
| F1-126 | 36530  | 30  | 13  | 0.15 | 1219  | 0.40915 | 1.4 | 8.00012 | 2.1 | 0.14181 | 1.6 | 0.65 | 2211 | 25 | 2231 | 19 | 2249 | 27 | <b>98</b>  |

|        |        |      |     |      |       |         |     |         |     |         |     |      |      |    |      |    |      |    |            |
|--------|--------|------|-----|------|-------|---------|-----|---------|-----|---------|-----|------|------|----|------|----|------|----|------------|
| F1-127 | 51386  | 44   | 18  | 0.26 | 7111  | 0.36891 | 1.9 | 7.02343 | 2.1 | 0.13808 | 0.9 | 0.90 | 2024 | 33 | 2114 | 19 | 2203 | 16 | <b>92</b>  |
| F1-128 | 148628 | 134  | 57  | 0.37 | 66647 | 0.38846 | 1.1 | 6.88853 | 1.4 | 0.12861 | 0.7 | 0.84 | 2116 | 21 | 2097 | 12 | 2079 | 13 | <b>102</b> |
| F1-129 | 58051  | 50   | 22  | 0.48 | 40488 | 0.39177 | 1.0 | 7.18984 | 1.3 | 0.13310 | 0.8 | 0.80 | 2131 | 18 | 2135 | 11 | 2139 | 13 | <b>100</b> |
| F1-130 | 69907  | 60   | 25  | 0.33 | 22650 | 0.38764 | 1.4 | 7.14220 | 1.7 | 0.13363 | 0.9 | 0.84 | 2112 | 26 | 2129 | 15 | 2146 | 16 | <b>98</b>  |
| F1-131 | 118507 | 136  | 40  | 0.20 | 877   | 0.26016 | 1.2 | 5.22453 | 1.3 | 0.14565 | 0.7 | 0.87 | 1491 | 15 | 1857 | 11 | 2295 | 11 | 65         |
| F1-132 | 66302  | 57   | 25  | 0.35 | 11619 | 0.40694 | 1.3 | 7.70681 | 1.5 | 0.13735 | 0.8 | 0.84 | 2201 | 24 | 2197 | 14 | 2194 | 14 | <b>100</b> |
| F1-133 | 66715  | 50   | 23  | 0.35 | 47088 | 0.42482 | 1.1 | 8.44402 | 1.3 | 0.14416 | 0.8 | 0.82 | 2282 | 21 | 2280 | 12 | 2278 | 13 | <b>100</b> |
| F1-134 | 171801 | 239  | 31  | 0.32 | 249   | 0.08973 | 3.6 | 1.53536 | 4.3 | 0.12410 | 2.4 | 0.83 | 554  | 19 | 945  | 27 | 2016 | 42 | 27         |
| F1-135 | 47613  | 42   | 18  | 0.25 | 35463 | 0.39848 | 1.5 | 7.49262 | 1.7 | 0.13637 | 0.8 | 0.89 | 2162 | 28 | 2172 | 16 | 2182 | 14 | <b>99</b>  |
| F1-136 | 328147 | 533  | 107 | 0.05 | 190   | 0.16910 | 2.0 | 2.74703 | 2.4 | 0.11782 | 1.4 | 0.81 | 1007 | 18 | 1341 | 18 | 1923 | 26 | 52         |
| F1-137 | 96098  | 89   | 29  | 0.43 | 2471  | 0.26400 | 1.2 | 5.01786 | 1.5 | 0.13785 | 0.8 | 0.84 | 1510 | 16 | 1822 | 12 | 2200 | 14 | 69         |
| F1-138 | 96317  | 86   | 37  | 0.37 | 73622 | 0.38649 | 1.1 | 7.09510 | 1.3 | 0.13314 | 0.6 | 0.88 | 2107 | 20 | 2123 | 11 | 2140 | 11 | <b>98</b>  |
| F1-139 | 117369 | 107  | 45  | 0.23 | 17242 | 0.39926 | 1.1 | 7.39512 | 1.2 | 0.13433 | 0.5 | 0.91 | 2166 | 21 | 2160 | 11 | 2155 | 9  | <b>100</b> |
| F1-140 | 46931  | 39   | 17  | 0.42 | 17214 | 0.39060 | 1.5 | 7.38020 | 1.8 | 0.13703 | 1.0 | 0.84 | 2126 | 28 | 2159 | 16 | 2190 | 17 | <b>97</b>  |
| F1-141 | 80618  | 75   | 34  | 0.55 | 62188 | 0.38565 | 1.3 | 7.02226 | 1.7 | 0.13206 | 1.0 | 0.80 | 2103 | 24 | 2114 | 15 | 2126 | 18 | <b>99</b>  |
| F1-142 | 252850 | 354  | 118 | 0.13 | 464   | 0.26523 | 1.7 | 5.44039 | 2.0 | 0.14877 | 1.0 | 0.87 | 1517 | 24 | 1891 | 17 | 2332 | 17 | 65         |
| F1-143 | 86586  | 74   | 31  | 0.32 | 6062  | 0.37838 | 1.2 | 7.20150 | 1.5 | 0.13804 | 0.9 | 0.79 | 2069 | 21 | 2137 | 14 | 2203 | 16 | <b>94</b>  |
| F1-144 | 93307  | 79   | 34  | 0.39 | 3080  | 0.37096 | 1.6 | 7.55803 | 1.8 | 0.14777 | 0.7 | 0.91 | 2034 | 28 | 2180 | 16 | 2320 | 12 | 88         |
| F1-145 | 137929 | 140  | 47  | 0.24 | 645   | 0.29226 | 1.3 | 6.00868 | 1.6 | 0.14911 | 0.9 | 0.84 | 1653 | 20 | 1977 | 14 | 2336 | 15 | 71         |
| F1-146 | 62223  | 56   | 24  | 0.34 | 47451 | 0.39039 | 1.4 | 7.17724 | 1.6 | 0.13334 | 0.8 | 0.87 | 2125 | 26 | 2134 | 15 | 2142 | 14 | <b>99</b>  |
| F1-147 | 96710  | 79   | 33  | 0.27 | 37514 | 0.38711 | 1.5 | 7.24922 | 1.8 | 0.13582 | 1.0 | 0.83 | 2109 | 27 | 2143 | 16 | 2175 | 18 | <b>97</b>  |
| F1-148 | 74488  | 58   | 26  | 0.26 | 52434 | 0.41919 | 1.4 | 8.35433 | 1.7 | 0.14454 | 0.9 | 0.84 | 2257 | 27 | 2270 | 15 | 2282 | 16 | <b>99</b>  |
| F1-149 | 173730 | 217  | 65  | 0.24 | 641   | 0.27154 | 1.4 | 4.58366 | 1.6 | 0.12243 | 0.7 | 0.88 | 1549 | 19 | 1746 | 13 | 1992 | 13 | 78         |
| F1-150 | 52365  | 43   | 19  | 0.48 | 11877 | 0.39536 | 1.5 | 7.47996 | 1.6 | 0.13721 | 0.7 | 0.90 | 2148 | 27 | 2171 | 15 | 2192 | 12 | <b>98</b>  |
| F1-151 | 33819  | 28   | 13  | 0.29 | 8800  | 0.41872 | 1.0 | 7.93037 | 1.5 | 0.13736 | 1.1 | 0.68 | 2255 | 19 | 2223 | 14 | 2194 | 19 | <b>103</b> |
| F1-152 | 109020 | 154  | 29  | 0.31 | 417   | 0.13569 | 2.9 | 2.91516 | 3.2 | 0.15581 | 1.4 | 0.90 | 820  | 22 | 1386 | 24 | 2411 | 24 | 34         |
| F1-153 | 164884 | 213  | 66  | 0.18 | 387   | 0.28014 | 1.4 | 4.86662 | 1.7 | 0.12599 | 1.0 | 0.80 | 1592 | 20 | 1796 | 15 | 2043 | 18 | 78         |
| F1-154 | 36003  | 37   | 12  | 0.35 | 383   | 0.28890 | 3.1 | 6.57627 | 3.6 | 0.16509 | 1.8 | 0.86 | 1636 | 45 | 2056 | 33 | 2509 | 31 | 65         |
| F1-155 | 662756 | 1084 | 169 | 0.05 | 87    | 0.10734 | 2.3 | 1.59480 | 2.6 | 0.10775 | 1.3 | 0.88 | 657  | 14 | 968  | 16 | 1762 | 23 | 37         |
| F1-156 | 65494  | 55   | 25  | 0.30 | 11154 | 0.40860 | 1.2 | 7.77063 | 1.5 | 0.13793 | 0.9 | 0.80 | 2209 | 23 | 2205 | 14 | 2201 | 16 | <b>100</b> |
| F1-157 | 179017 | 177  | 75  | 0.21 | 71482 | 0.40353 | 1.1 | 7.24032 | 1.2 | 0.13013 | 0.5 | 0.93 | 2185 | 21 | 2141 | 11 | 2100 | 8  | <b>104</b> |
| F1-158 | 230728 | 325  | 81  | 0.29 | 536   | 0.20761 | 1.6 | 3.45442 | 1.9 | 0.12068 | 1.0 | 0.85 | 1216 | 18 | 1517 | 15 | 1966 | 18 | 62         |
| F1-159 | 306836 | 514  | 123 | 0.27 | 235   | 0.20607 | 3.2 | 3.14059 | 3.6 | 0.11053 | 1.7 | 0.89 | 1208 | 35 | 1443 | 28 | 1808 | 30 | 67         |

|        |        |      |     |      |       |         |     |         |     |         |     |      |      |    |      |    |      |    |            |
|--------|--------|------|-----|------|-------|---------|-----|---------|-----|---------|-----|------|------|----|------|----|------|----|------------|
| F1-160 | 40147  | 35   | 15  | 0.42 | 29735 | 0.39093 | 1.4 | 7.40157 | 1.8 | 0.13732 | 1.2 | 0.77 | 2127 | 25 | 2161 | 16 | 2194 | 20 | <b>97</b>  |
| N1-001 | 100034 | 452  | 33  | 0.07 | 875   | 0.05709 | 8.3 | 0.95636 | 8.3 | 0.12150 | 0.9 | 0.99 | 358  | 29 | 681  | 42 | 1978 | 17 | 18         |
| N1-002 | 148849 | 150  | 58  | 0.27 | 34707 | 0.36520 | 1.5 | 6.17718 | 1.6 | 0.12268 | 0.5 | 0.95 | 2007 | 26 | 2001 | 14 | 1996 | 8  | <b>101</b> |
| N1-003 | 57989  | 54   | 25  | 0.56 | 9781  | 0.39651 | 1.7 | 7.49468 | 1.8 | 0.13709 | 0.7 | 0.91 | 2153 | 30 | 2172 | 16 | 2191 | 13 | <b>98</b>  |
| N1-004 | 39510  | 49   | 19  | 0.67 | 12229 | 0.32884 | 1.7 | 5.34881 | 2.0 | 0.11797 | 1.0 | 0.87 | 1833 | 27 | 1877 | 17 | 1926 | 17 | <b>95</b>  |
| N1-005 | 530998 | 410  | 143 | 0.07 | 71    | 0.23560 | 6.0 | 3.80175 | 6.6 | 0.11703 | 2.9 | 0.90 | 1364 | 74 | 1593 | 55 | 1911 | 53 | 71         |
| N1-006 | 132014 | 149  | 49  | 0.23 | 44427 | 0.32069 | 1.5 | 5.47393 | 1.6 | 0.12380 | 0.6 | 0.93 | 1793 | 23 | 1897 | 14 | 2012 | 11 | 89         |
| N1-007 | 89940  | 144  | 34  | 0.71 | 2551  | 0.20576 | 2.0 | 3.43820 | 2.2 | 0.12119 | 1.0 | 0.90 | 1206 | 22 | 1513 | 17 | 1974 | 17 | 61         |
| N1-008 | 70225  | 82   | 25  | 0.64 | 3744  | 0.26259 | 2.0 | 4.87444 | 2.1 | 0.13463 | 0.7 | 0.94 | 1503 | 27 | 1798 | 18 | 2159 | 12 | 70         |
| N1-009 | 105818 | 156  | 49  | 0.50 | 3843  | 0.27990 | 1.5 | 4.56311 | 1.6 | 0.11824 | 0.7 | 0.90 | 1591 | 21 | 1743 | 14 | 1930 | 13 | 82         |
| N1-010 | 244283 | 281  | 108 | 0.12 | 3161  | 0.30371 | 1.5 | 5.37556 | 1.5 | 0.12837 | 0.5 | 0.95 | 1710 | 22 | 1881 | 13 | 2076 | 9  | 82         |
| N1-011 | 112509 | 200  | 57  | 0.61 | 3575  | 0.26679 | 3.4 | 4.70653 | 3.5 | 0.12795 | 1.0 | 0.96 | 1524 | 46 | 1768 | 30 | 2070 | 18 | 74         |
| N1-012 | 117898 | 300  | 63  | 0.28 | 1274  | 0.18339 | 5.3 | 3.17493 | 5.4 | 0.12556 | 0.9 | 0.99 | 1085 | 54 | 1451 | 43 | 2037 | 16 | 53         |
| N1-013 | 198560 | 624  | 178 | 0.05 | 965   | 0.27127 | 2.1 | 4.73279 | 2.3 | 0.12653 | 0.9 | 0.92 | 1547 | 30 | 1773 | 20 | 2050 | 17 | 75         |
| N1-014 | 84235  | 158  | 46  | 0.53 | 1497  | 0.27066 | 1.8 | 4.75836 | 2.0 | 0.12751 | 0.8 | 0.91 | 1544 | 25 | 1778 | 17 | 2064 | 15 | 75         |
| N1-015 | 261750 | 415  | 97  | 0.12 | 2744  | 0.20260 | 2.0 | 3.61072 | 2.1 | 0.12926 | 0.6 | 0.96 | 1189 | 22 | 1552 | 17 | 2088 | 10 | 57         |
| N1-016 | 244040 | 591  | 87  | 0.05 | 616   | 0.12886 | 6.7 | 2.11321 | 6.8 | 0.11894 | 1.2 | 0.98 | 781  | 50 | 1153 | 48 | 1940 | 22 | 40         |
| N1-017 | 311073 | 568  | 116 | 0.04 | 263   | 0.15787 | 5.0 | 3.65815 | 5.5 | 0.16805 | 2.4 | 0.90 | 945  | 44 | 1562 | 45 | 2538 | 40 | 37         |
| N1-018 | 139585 | 1062 | 67  | 0.04 | 503   | 0.05768 | 5.8 | 0.86979 | 5.9 | 0.10938 | 0.8 | 0.99 | 361  | 21 | 635  | 28 | 1789 | 15 | 20         |
| N1-019 | 80948  | 152  | 36  | 0.69 | 7539  | 0.21305 | 4.3 | 3.70514 | 4.4 | 0.12613 | 1.0 | 0.97 | 1245 | 48 | 1572 | 36 | 2045 | 18 | 61         |
| N1-020 | -      | -    | -   | -    | -     | -       | -   | -       | -   | -       | -   | -    | -    | -  | -    | -  | -    | -  | -          |
| N1-021 | 70585  | 95   | 29  | 0.49 | 1847  | 0.27957 | 1.9 | 5.20916 | 2.1 | 0.13514 | 0.9 | 0.91 | 1589 | 27 | 1854 | 18 | 2166 | 15 | 73         |
| N1-022 | 170460 | 622  | 56  | 0.06 | 516   | 0.07244 | 7.2 | 1.17469 | 7.3 | 0.11762 | 1.0 | 0.99 | 451  | 31 | 789  | 41 | 1920 | 18 | 23         |
| N1-023 | 269360 | 2101 | 119 | 0.04 | 386   | 0.04717 | 3.6 | 0.93870 | 3.9 | 0.14433 | 1.4 | 0.93 | 297  | 10 | 672  | 19 | 2280 | 25 | 13         |
| N1-024 | 53344  | 47   | 24  | 0.92 | 41259 | 0.38949 | 1.7 | 7.03344 | 2.0 | 0.13097 | 1.1 | 0.84 | 2120 | 31 | 2116 | 18 | 2111 | 19 | <b>100</b> |
| N1-025 | 180028 | 449  | 76  | 0.07 | 487   | 0.12729 | 2.0 | 2.32992 | 2.2 | 0.13276 | 0.9 | 0.92 | 772  | 15 | 1221 | 16 | 2135 | 15 | 36         |
| N1-026 | 121388 | 880  | 64  | 0.06 | 776   | 0.06370 | 3.1 | 1.14578 | 3.2 | 0.13046 | 0.7 | 0.98 | 398  | 12 | 775  | 18 | 2104 | 11 | 19         |
| N1-027 | 32714  | 37   | 14  | 0.80 | 6114  | 0.30912 | 1.9 | 6.24541 | 2.3 | 0.14653 | 1.3 | 0.82 | 1736 | 29 | 2011 | 20 | 2306 | 22 | 75         |
| N1-028 | 90121  | 95   | 38  | 0.47 | 45698 | 0.35497 | 1.6 | 5.85354 | 1.7 | 0.11960 | 0.6 | 0.92 | 1958 | 26 | 1954 | 15 | 1950 | 11 | <b>100</b> |
| N1-029 | 160912 | 299  | 45  | 0.42 | 309   | 0.11452 | 4.1 | 2.46967 | 4.2 | 0.15640 | 1.0 | 0.97 | 699  | 27 | 1263 | 31 | 2417 | 17 | 29         |
| N1-030 | 53813  | 55   | 22  | 0.43 | 9632  | 0.36917 | 1.8 | 6.87157 | 2.0 | 0.13500 | 0.9 | 0.90 | 2026 | 31 | 2095 | 18 | 2164 | 15 | <b>94</b>  |
| N1-031 | 167085 | 169  | 67  | 0.57 | 3474  | 0.33199 | 2.2 | 6.29191 | 2.3 | 0.13745 | 0.7 | 0.96 | 1848 | 36 | 2017 | 20 | 2195 | 12 | 84         |

|        |        |      |     |      |        |         |     |         |     |         |     |      |      |    |      |    |      |    |            |
|--------|--------|------|-----|------|--------|---------|-----|---------|-----|---------|-----|------|------|----|------|----|------|----|------------|
| N1-032 | 172853 | 1887 | 80  | 0.04 | 538    | 0.03469 | 3.7 | 0.59109 | 3.8 | 0.12358 | 0.7 | 0.98 | 220  | 8  | 472  | 14 | 2009 | 12 | 11         |
| N1-033 | 178546 | 258  | 71  | 0.31 | 937    | 0.25440 | 2.2 | 4.13368 | 2.4 | 0.11785 | 0.9 | 0.93 | 1461 | 29 | 1661 | 19 | 1924 | 15 | 76         |
| N1-034 | 255493 | 2306 | 104 | 0.04 | 496    | 0.03595 | 2.6 | 0.69295 | 2.9 | 0.13980 | 1.2 | 0.91 | 228  | 6  | 535  | 12 | 2225 | 21 | 10         |
| N1-035 | 96090  | 119  | 43  | 0.32 | 51980  | 0.33513 | 1.6 | 5.49699 | 1.7 | 0.11896 | 0.7 | 0.92 | 1863 | 26 | 1900 | 15 | 1941 | 12 | <b>96</b>  |
| N1-036 | 125147 | 191  | 51  | 0.61 | 3048   | 0.23147 | 3.0 | 3.76842 | 3.1 | 0.11808 | 0.7 | 0.98 | 1342 | 37 | 1586 | 25 | 1927 | 12 | 70         |
| N1-037 | 173666 | 335  | 67  | 0.40 | 550    | 0.17201 | 1.9 | 2.85945 | 2.4 | 0.12057 | 1.5 | 0.79 | 1023 | 18 | 1371 | 18 | 1965 | 26 | 52         |
| N1-038 | 52198  | 42   | 17  | 0.58 | 3472   | 0.36612 | 4.3 | 9.02366 | 4.7 | 0.17875 | 1.8 | 0.93 | 2011 | 76 | 2340 | 44 | 2641 | 29 | 76         |
| N1-039 | 155233 | 131  | 59  | 0.36 | 100222 | 0.41003 | 1.5 | 7.82964 | 1.6 | 0.13849 | 0.6 | 0.93 | 2215 | 29 | 2212 | 15 | 2208 | 10 | <b>100</b> |
| N1-040 | 265268 | 1108 | 102 | 0.04 | 544    | 0.07680 | 2.7 | 1.48648 | 2.8 | 0.14037 | 0.7 | 0.97 | 477  | 12 | 925  | 17 | 2232 | 12 | 21         |
| N1-041 | 63447  | 52   | 25  | 0.47 | 10650  | 0.43081 | 2.4 | 9.42111 | 3.2 | 0.15861 | 2.1 | 0.75 | 2309 | 46 | 2380 | 29 | 2441 | 35 | <b>95</b>  |
| N1-042 | 165232 | 228  | 67  | 0.54 | 444    | 0.24648 | 5.0 | 4.11846 | 5.1 | 0.12119 | 0.8 | 0.99 | 1420 | 64 | 1658 | 42 | 1974 | 14 | 72         |
| N1-043 | 66848  | 79   | 34  | 0.62 | 6507   | 0.37898 | 1.4 | 6.45915 | 1.8 | 0.12361 | 1.0 | 0.82 | 2072 | 26 | 2040 | 16 | 2009 | 18 | <b>103</b> |
| N1-044 | 89774  | 84   | 34  | 0.35 | 70102  | 0.36070 | 1.7 | 6.44973 | 2.0 | 0.12969 | 1.0 | 0.86 | 1985 | 29 | 2039 | 17 | 2094 | 17 | <b>95</b>  |
| N1-045 | 61828  | 180  | 30  | 0.63 | 1236   | 0.14234 | 2.2 | 2.56204 | 2.6 | 0.13055 | 1.3 | 0.86 | 858  | 18 | 1290 | 19 | 2105 | 23 | 41         |
| N1-046 | 249735 | 1863 | 97  | 0.05 | 445    | 0.04198 | 2.6 | 0.88319 | 2.6 | 0.15257 | 0.4 | 0.99 | 265  | 7  | 643  | 13 | 2375 | 7  | 11         |
| N1-047 | 131306 | 1176 | 56  | 0.06 | 452    | 0.03950 | 6.1 | 0.74516 | 6.3 | 0.13682 | 1.2 | 0.98 | 250  | 15 | 565  | 28 | 2187 | 21 | 11         |
| N1-048 | 138678 | 325  | 89  | 0.09 | 1121   | 0.24836 | 1.4 | 4.52827 | 1.8 | 0.13224 | 1.1 | 0.79 | 1430 | 18 | 1736 | 15 | 2128 | 20 | 67         |
| N1-049 | 144164 | 191  | 71  | 0.72 | 1704   | 0.31953 | 1.7 | 5.28952 | 2.1 | 0.12006 | 1.2 | 0.81 | 1787 | 26 | 1867 | 18 | 1957 | 21 | <b>91</b>  |
| N1-050 | 75874  | 167  | 28  | 0.65 | 4902   | 0.13216 | 1.8 | 2.13815 | 2.2 | 0.11734 | 1.3 | 0.80 | 800  | 13 | 1161 | 15 | 1916 | 23 | 42         |
| N1-051 | 135360 | 341  | 56  | 0.24 | 5664   | 0.14772 | 4.2 | 2.54852 | 4.3 | 0.12513 | 0.6 | 0.99 | 888  | 35 | 1286 | 32 | 2031 | 11 | 44         |
| N1-052 | 176496 | 109  | 59  | 0.60 | 23156  | 0.45198 | 1.6 | 9.85098 | 1.8 | 0.15807 | 0.6 | 0.94 | 2404 | 33 | 2421 | 16 | 2435 | 10 | <b>99</b>  |
| N1-053 | 149601 | 166  | 67  | 0.35 | 3356   | 0.37595 | 2.0 | 6.57956 | 2.2 | 0.12693 | 0.8 | 0.93 | 2057 | 36 | 2057 | 19 | 2056 | 14 | <b>100</b> |
| N1-054 | 109815 | 231  | 55  | 0.54 | 2340   | 0.20714 | 2.0 | 3.67651 | 2.2 | 0.12873 | 0.8 | 0.92 | 1214 | 22 | 1566 | 17 | 2081 | 15 | 58         |
| N1-055 | 263008 | 265  | 90  | 0.43 | 3607   | 0.29299 | 2.2 | 5.75251 | 2.3 | 0.14240 | 0.6 | 0.97 | 1656 | 33 | 1939 | 20 | 2257 | 10 | 73         |
| N1-056 | 138892 | 270  | 66  | 0.52 | 1728   | 0.22223 | 2.1 | 3.57335 | 2.2 | 0.11662 | 0.7 | 0.94 | 1294 | 24 | 1544 | 18 | 1905 | 13 | 68         |
| N1-057 | 206895 | 1655 | 85  | 0.03 | 349    | 0.04590 | 2.3 | 0.56132 | 2.6 | 0.08870 | 1.1 | 0.90 | 289  | 7  | 452  | 9  | 1398 | 21 | 21         |
| N1-058 | 84394  | 96   | 37  | 0.41 | 72973  | 0.34649 | 1.6 | 5.59685 | 1.8 | 0.11715 | 0.9 | 0.86 | 1918 | 26 | 1916 | 16 | 1913 | 17 | <b>100</b> |
| N1-059 | 110046 | 254  | 47  | 0.38 | 684    | 0.15609 | 3.0 | 2.55142 | 3.5 | 0.11855 | 1.8 | 0.86 | 935  | 26 | 1287 | 26 | 1935 | 33 | 48         |
| N1-060 | 226170 | 970  | 73  | 0.05 | 275    | 0.05630 | 5.3 | 0.85919 | 5.5 | 0.11069 | 1.4 | 0.97 | 353  | 18 | 630  | 26 | 1811 | 26 | 19         |
| N1-061 | 126174 | 115  | 51  | 0.57 | 24791  | 0.38021 | 1.6 | 7.15279 | 1.8 | 0.13644 | 0.8 | 0.90 | 2077 | 28 | 2131 | 16 | 2183 | 13 | <b>95</b>  |
| N1-062 | 115112 | 134  | 37  | 0.71 | 4509   | 0.23122 | 1.7 | 4.23513 | 1.9 | 0.13284 | 0.8 | 0.90 | 1341 | 20 | 1681 | 15 | 2136 | 14 | 63         |
| N1-063 | 17754  | 34   | 8   | 0.95 | 2418   | 0.18287 | 3.6 | 3.28203 | 3.9 | 0.13017 | 1.4 | 0.93 | 1083 | 36 | 1477 | 31 | 2100 | 25 | 52         |
| N1-064 | 87558  | 126  | 43  | 0.53 | 6803   | 0.31482 | 1.5 | 5.08926 | 1.8 | 0.11724 | 0.9 | 0.86 | 1764 | 24 | 1834 | 15 | 1915 | 17 | <b>92</b>  |

|        |        |      |     |      |       |         |      |          |      |         |     |      |      |     |      |    |      |    |            |
|--------|--------|------|-----|------|-------|---------|------|----------|------|---------|-----|------|------|-----|------|----|------|----|------------|
| N1-065 | 81887  | 69   | 29  | 0.26 | 20669 | 0.39667 | 1.6  | 7.41698  | 1.7  | 0.13561 | 0.7 | 0.91 | 2154 | 28  | 2163 | 15 | 2172 | 12 | <b>99</b>  |
| N1-066 | 202822 | 89   | 55  | 0.41 | 27031 | 0.53594 | 1.7  | 14.80545 | 1.9  | 0.20036 | 0.8 | 0.91 | 2766 | 38  | 2803 | 18 | 2829 | 13 | <b>98</b>  |
| N1-067 | 198993 | 233  | 72  | 0.39 | 1810  | 0.28191 | 1.7  | 5.18836  | 1.8  | 0.13348 | 0.5 | 0.95 | 1601 | 25  | 1851 | 16 | 2144 | 10 | 75         |
| N1-068 | 75204  | 83   | 31  | 0.59 | 5008  | 0.32394 | 1.8  | 6.07575  | 2.0  | 0.13603 | 0.8 | 0.92 | 1809 | 29  | 1987 | 17 | 2177 | 13 | 83         |
| N1-069 | 185782 | 755  | 125 | 0.05 | 666   | 0.15548 | 1.6  | 2.17455  | 2.2  | 0.10144 | 1.6 | 0.71 | 932  | 14  | 1173 | 16 | 1651 | 29 | 56         |
| N1-070 | 136956 | 190  | 70  | 0.54 | 5617  | 0.33258 | 1.5  | 5.33722  | 1.7  | 0.11639 | 0.7 | 0.92 | 1851 | 25  | 1875 | 14 | 1902 | 12 | <b>97</b>  |
| N1-071 | 183541 | 195  | 86  | 0.53 | 7659  | 0.38248 | 1.5  | 6.77364  | 1.6  | 0.12844 | 0.6 | 0.92 | 2088 | 26  | 2082 | 14 | 2077 | 11 | <b>101</b> |
| N1-072 | 175280 | 277  | 88  | 0.50 | 6893  | 0.27967 | 3.0  | 4.38822  | 3.1  | 0.11380 | 0.6 | 0.98 | 1590 | 43  | 1710 | 26 | 1861 | 11 | 85         |
| N1-073 | 341028 | 368  | 120 | 0.37 | 1094  | 0.29268 | 2.6  | 7.29976  | 2.7  | 0.18089 | 0.8 | 0.96 | 1655 | 38  | 2149 | 25 | 2661 | 13 | 62         |
| N1-074 | 140531 | 191  | 72  | 0.59 | 6181  | 0.33507 | 1.8  | 5.35653  | 1.9  | 0.11594 | 0.8 | 0.90 | 1863 | 29  | 1878 | 17 | 1895 | 15 | <b>98</b>  |
| N1-075 | 139890 | 201  | 80  | 0.52 | 4798  | 0.36650 | 1.8  | 6.53218  | 2.0  | 0.12927 | 0.8 | 0.91 | 2013 | 31  | 2050 | 18 | 2088 | 15 | <b>96</b>  |
| N1-076 | 162455 | 970  | 79  | 0.05 | 306   | 0.06172 | 3.5  | 1.32678  | 3.7  | 0.15590 | 1.1 | 0.95 | 386  | 13  | 857  | 22 | 2412 | 20 | 16         |
| N1-077 | 115023 | 134  | 49  | 0.45 | 11557 | 0.34437 | 2.0  | 6.29635  | 2.2  | 0.13260 | 0.8 | 0.93 | 1908 | 34  | 2018 | 19 | 2133 | 14 | 89         |
| N1-078 | 212956 | 1115 | 51  | 0.06 | 1161  | 0.03209 | 20.1 | 0.62843  | 20.1 | 0.14204 | 0.6 | 1.00 | 204  | 40  | 495  | 82 | 2252 | 11 | 9          |
| N1-079 | 192801 | 237  | 92  | 0.50 | 5503  | 0.36391 | 3.7  | 6.37065  | 3.8  | 0.12697 | 0.8 | 0.98 | 2001 | 64  | 2028 | 34 | 2056 | 15 | <b>97</b>  |
| N1-080 | 337644 | 134  | 81  | 0.46 | 14112 | 0.51367 | 2.0  | 17.80965 | 2.0  | 0.25146 | 0.4 | 0.98 | 2672 | 44  | 2980 | 20 | 3194 | 6  | 84         |
| N1-081 | 243041 | 1291 | 78  | 0.04 | 265   | 0.04526 | 5.8  | 0.95121  | 5.8  | 0.15243 | 0.9 | 0.99 | 285  | 16  | 679  | 29 | 2373 | 16 | 12         |
| N1-082 | 91900  | 151  | 47  | 0.98 | 1068  | 0.24239 | 3.4  | 4.41337  | 3.6  | 0.13205 | 1.3 | 0.93 | 1399 | 42  | 1715 | 30 | 2125 | 24 | 66         |
| N1-083 | 252396 | 1243 | 100 | 0.04 | 269   | 0.06265 | 2.7  | 1.28446  | 2.7  | 0.14870 | 0.6 | 0.97 | 392  | 10  | 839  | 16 | 2331 | 11 | 17         |
| N1-084 | 220550 | 478  | 78  | 0.06 | 747   | 0.13341 | 1.6  | 2.46853  | 1.7  | 0.13420 | 0.6 | 0.94 | 807  | 12  | 1263 | 13 | 2154 | 10 | 37         |
| N1-085 | 147951 | 233  | 78  | 0.55 | 2468  | 0.30701 | 1.9  | 5.17118  | 2.1  | 0.12216 | 0.9 | 0.91 | 1726 | 29  | 1848 | 18 | 1988 | 15 | 87         |
| N1-086 | 92076  | 226  | 51  | 0.35 | 1858  | 0.20817 | 1.8  | 3.86769  | 2.0  | 0.13475 | 1.0 | 0.88 | 1219 | 20  | 1607 | 16 | 2161 | 17 | 56         |
| N1-087 | 151382 | 669  | 54  | 0.05 | 358   | 0.06206 | 7.4  | 1.30948  | 7.4  | 0.15304 | 0.7 | 1.00 | 388  | 28  | 850  | 44 | 2380 | 12 | 16         |
| N1-088 | 149700 | 225  | 67  | 0.56 | 1353  | 0.25618 | 7.7  | 4.79715  | 7.7  | 0.13581 | 0.8 | 0.99 | 1470 | 102 | 1784 | 67 | 2174 | 13 | 68         |
| N1-089 | 100486 | 119  | 50  | 0.56 | 14875 | 0.37535 | 1.5  | 6.33308  | 1.6  | 0.12237 | 0.7 | 0.91 | 2055 | 26  | 2023 | 14 | 1991 | 12 | <b>103</b> |
| N1-090 | 168100 | 146  | 65  | 0.42 | 23885 | 0.39380 | 1.8  | 7.34108  | 1.9  | 0.13520 | 0.6 | 0.95 | 2140 | 33  | 2154 | 17 | 2167 | 11 | <b>99</b>  |
| N1-091 | 224028 | 354  | 79  | 0.12 | 10059 | 0.21470 | 3.1  | 3.85173  | 3.1  | 0.13011 | 0.6 | 0.98 | 1254 | 35  | 1604 | 25 | 2099 | 10 | 60         |
| N1-092 | 129087 | 558  | 73  | 0.06 | 725   | 0.11370 | 2.5  | 1.65646  | 2.7  | 0.10566 | 1.1 | 0.92 | 694  | 16  | 992  | 17 | 1726 | 20 | 40         |
| N1-093 | 123855 | 122  | 51  | 0.38 | 11632 | 0.38065 | 1.6  | 6.95567  | 1.7  | 0.13253 | 0.6 | 0.93 | 2079 | 28  | 2106 | 15 | 2132 | 11 | <b>98</b>  |
| N1-094 | 98411  | 126  | 40  | 0.42 | 14751 | 0.29555 | 1.6  | 4.97279  | 1.8  | 0.12203 | 0.9 | 0.86 | 1669 | 23  | 1815 | 16 | 1986 | 16 | 84         |
| N1-095 | 137937 | 208  | 63  | 0.66 | 691   | 0.25648 | 2.3  | 4.31392  | 2.5  | 0.12199 | 1.0 | 0.92 | 1472 | 30  | 1696 | 21 | 1985 | 17 | 74         |
| N1-096 | 211247 | 248  | 71  | 0.54 | 523   | 0.23601 | 3.2  | 4.15494  | 3.6  | 0.12768 | 1.5 | 0.91 | 1366 | 40  | 1665 | 29 | 2066 | 26 | 66         |
| N1-097 | 186448 | 1136 | 93  | 0.04 | 218   | 0.06279 | 3.4  | 1.32583  | 3.6  | 0.15314 | 0.9 | 0.97 | 393  | 13  | 857  | 21 | 2381 | 16 | 16         |



|        |        |      |     |      |       |         |     |          |     |         |     |      |      |    |      |    |      |    |            |
|--------|--------|------|-----|------|-------|---------|-----|----------|-----|---------|-----|------|------|----|------|----|------|----|------------|
| N1-098 | 162695 | 735  | 86  | 0.06 | 1009  | 0.09775 | 4.6 | 1.61307  | 4.6 | 0.11969 | 0.6 | 0.99 | 601  | 26 | 975  | 30 | 1952 | 11 | 31         |
| N1-099 | 62459  | 95   | 29  | 0.62 | 1196  | 0.27619 | 5.8 | 4.97608  | 6.0 | 0.13067 | 1.4 | 0.97 | 1572 | 81 | 1815 | 52 | 2107 | 24 | 75         |
| N1-100 | 43128  | 72   | 21  | 0.61 | 3597  | 0.26283 | 2.3 | 4.34855  | 2.6 | 0.12000 | 1.2 | 0.89 | 1504 | 31 | 1703 | 22 | 1956 | 21 | 77         |
| N1-101 | 230403 | 724  | 93  | 0.05 | 2282  | 0.11846 | 4.9 | 2.14220  | 4.9 | 0.13116 | 0.8 | 0.99 | 722  | 33 | 1163 | 35 | 2114 | 15 | 34         |
| N1-102 | 112905 | 1814 | 47  | 0.04 | 347   | 0.01884 | 3.1 | 0.35308  | 3.5 | 0.13590 | 1.5 | 0.91 | 120  | 4  | 307  | 9  | 2176 | 26 | 6          |
| N1-103 | 124972 | 128  | 56  | 0.47 | 8284  | 0.38567 | 1.6 | 7.24841  | 1.9 | 0.13631 | 1.1 | 0.82 | 2103 | 28 | 2142 | 17 | 2181 | 19 | <b>96</b>  |
| N1-104 | 163116 | 105  | 51  | 0.26 | 10634 | 0.44631 | 2.2 | 10.02188 | 2.3 | 0.16286 | 0.6 | 0.96 | 2379 | 43 | 2437 | 21 | 2486 | 11 | <b>96</b>  |
| N1-105 | 161297 | 158  | 77  | 0.74 | 57294 | 0.39765 | 1.5 | 7.25693  | 1.6 | 0.13236 | 0.6 | 0.92 | 2158 | 28 | 2144 | 15 | 2130 | 11 | <b>101</b> |
| N1-106 | 107970 | 140  | 53  | 0.53 | 12898 | 0.33584 | 1.5 | 5.37474  | 1.6 | 0.11607 | 0.7 | 0.91 | 1867 | 24 | 1881 | 14 | 1897 | 12 | <b>98</b>  |
| N1-107 | 123145 | 118  | 48  | 0.37 | 6751  | 0.37322 | 1.8 | 7.03685  | 1.9 | 0.13674 | 0.6 | 0.95 | 2045 | 31 | 2116 | 17 | 2186 | 10 | <b>94</b>  |
| N1-108 | 148594 | 302  | 70  | 0.48 | 2699  | 0.20799 | 1.9 | 3.53083  | 2.0 | 0.12312 | 0.7 | 0.93 | 1218 | 21 | 1534 | 16 | 2002 | 13 | 61         |
| N1-109 | 130746 | 230  | 66  | 0.61 | 1241  | 0.25033 | 1.9 | 3.87869  | 2.2 | 0.11237 | 1.1 | 0.86 | 1440 | 25 | 1609 | 18 | 1838 | 21 | 78         |
| N1-110 | 152490 | 708  | 62  | 0.05 | 2971  | 0.07721 | 4.2 | 1.23630  | 4.2 | 0.11614 | 0.6 | 0.99 | 479  | 19 | 817  | 24 | 1898 | 10 | 25         |
| N1-111 | 47224  | 95   | 22  | 0.74 | 2960  | 0.20101 | 1.7 | 3.30050  | 2.0 | 0.11908 | 1.1 | 0.84 | 1181 | 19 | 1481 | 16 | 1943 | 19 | 61         |
| N1-112 | 179355 | 443  | 95  | 0.08 | 1000  | 0.19099 | 3.8 | 3.15235  | 3.9 | 0.11971 | 0.8 | 0.98 | 1127 | 40 | 1446 | 31 | 1952 | 15 | 58         |
| N1-113 | 365393 | 848  | 121 | 0.04 | 1104  | 0.12296 | 3.5 | 2.75595  | 3.6 | 0.16256 | 1.0 | 0.96 | 748  | 24 | 1344 | 27 | 2482 | 18 | 30         |
| N1-114 | 132209 | 569  | 57  | 0.05 | 1066  | 0.09014 | 2.9 | 1.71231  | 3.1 | 0.13778 | 1.1 | 0.94 | 556  | 15 | 1013 | 20 | 2199 | 18 | 25         |
| N1-115 | 134045 | 226  | 57  | 0.59 | 1072  | 0.21386 | 2.2 | 4.13201  | 2.4 | 0.14013 | 0.8 | 0.94 | 1249 | 25 | 1661 | 20 | 2229 | 14 | 56         |
| N1-116 | 86588  | 75   | 33  | 0.41 | 20804 | 0.39283 | 1.7 | 7.42863  | 1.9 | 0.13715 | 0.7 | 0.94 | 2136 | 32 | 2164 | 17 | 2192 | 11 | <b>97</b>  |
| N1-117 | 151416 | 251  | 71  | 0.45 | 1018  | 0.25127 | 2.8 | 4.39557  | 3.0 | 0.12688 | 0.9 | 0.95 | 1445 | 37 | 1712 | 25 | 2055 | 16 | 70         |
| N1-118 | 133548 | 292  | 89  | 0.43 | 1254  | 0.28575 | 5.3 | 4.37300  | 5.4 | 0.11099 | 1.1 | 0.98 | 1620 | 76 | 1707 | 45 | 1816 | 20 | 89         |
| N1-119 | 164743 | 229  | 71  | 0.61 | 2946  | 0.27963 | 2.0 | 4.92770  | 2.0 | 0.12781 | 0.5 | 0.97 | 1589 | 28 | 1807 | 17 | 2068 | 9  | 77         |
| N1-120 | 163387 | 165  | 71  | 0.57 | 4133  | 0.37748 | 2.4 | 6.80996  | 2.5 | 0.13084 | 0.7 | 0.96 | 2065 | 42 | 2087 | 22 | 2109 | 12 | <b>98</b>  |
| N1-121 | 308015 | 451  | 142 | 0.06 | 2346  | 0.27256 | 2.2 | 5.57046  | 2.2 | 0.14823 | 0.6 | 0.97 | 1554 | 30 | 1912 | 19 | 2326 | 10 | 67         |
| N1-122 | 148274 | 210  | 74  | 0.73 | 3192  | 0.30251 | 2.7 | 5.40986  | 2.7 | 0.12970 | 0.6 | 0.98 | 1704 | 40 | 1886 | 24 | 2094 | 10 | 81         |
| N1-123 | 156618 | 219  | 76  | 0.55 | 10595 | 0.30241 | 1.5 | 4.76667  | 1.6 | 0.11432 | 0.6 | 0.93 | 1703 | 23 | 1779 | 14 | 1869 | 11 | <b>91</b>  |
| N1-124 | 136733 | 194  | 55  | 0.30 | 17541 | 0.26222 | 5.1 | 4.57470  | 5.1 | 0.12653 | 0.7 | 0.99 | 1501 | 69 | 1745 | 44 | 2050 | 12 | 73         |
| N1-125 | 188234 | 441  | 64  | 0.11 | 2202  | 0.12533 | 3.9 | 2.34881  | 4.0 | 0.13593 | 0.8 | 0.98 | 761  | 28 | 1227 | 29 | 2176 | 14 | 35         |
| N1-126 | 134187 | 200  | 66  | 0.71 | 8722  | 0.27704 | 1.7 | 4.39530  | 1.8 | 0.11507 | 0.5 | 0.96 | 1576 | 24 | 1711 | 15 | 1881 | 9  | 84         |
| N1-127 | 213555 | 476  | 90  | 0.07 | 1659  | 0.16320 | 1.9 | 3.27379  | 2.0 | 0.14549 | 0.6 | 0.95 | 975  | 17 | 1475 | 16 | 2294 | 11 | 42         |
| N1-128 | 87661  | 116  | 38  | 0.63 | 20303 | 0.27712 | 2.1 | 5.27103  | 2.2 | 0.13795 | 0.8 | 0.93 | 1577 | 29 | 1864 | 19 | 2202 | 14 | 72         |
| N1-129 | 167887 | 126  | 68  | 0.87 | 49103 | 0.42454 | 1.6 | 9.32077  | 1.7 | 0.15923 | 0.5 | 0.95 | 2281 | 32 | 2370 | 16 | 2448 | 9  | <b>93</b>  |
| N1-130 | 136229 | 138  | 52  | 0.52 | 4313  | 0.32881 | 2.3 | 6.22726  | 2.4 | 0.13736 | 0.8 | 0.94 | 1833 | 36 | 2008 | 21 | 2194 | 14 | 84         |

|        |        |      |     |      |       |         |      |          |      |         |     |      |      |     |      |     |      |    |            |
|--------|--------|------|-----|------|-------|---------|------|----------|------|---------|-----|------|------|-----|------|-----|------|----|------------|
| N1-131 | 136940 | 197  | 63  | 0.45 | 5208  | 0.28845 | 2.1  | 4.63814  | 2.2  | 0.11662 | 0.6 | 0.96 | 1634 | 30  | 1756 | 18  | 1905 | 11 | 86         |
| N1-132 | 132327 | 120  | 55  | 0.41 | 19735 | 0.41205 | 1.6  | 7.70642  | 1.7  | 0.13564 | 0.7 | 0.91 | 2224 | 30  | 2197 | 16  | 2172 | 12 | <b>102</b> |
| N1-133 | 121471 | 129  | 59  | 0.40 | 34448 | 0.42178 | 1.7  | 7.62217  | 2.0  | 0.13107 | 1.0 | 0.85 | 2269 | 32  | 2187 | 18  | 2112 | 18 | <b>107</b> |
| N1-134 | 229301 | 985  | 115 | 0.05 | 812   | 0.09975 | 1.7  | 1.91279  | 1.8  | 0.13908 | 0.7 | 0.92 | 613  | 10  | 1086 | 12  | 2216 | 12 | 28         |
| N1-135 | 111063 | 154  | 55  | 0.47 | 14859 | 0.32148 | 1.6  | 5.13288  | 1.7  | 0.11580 | 0.7 | 0.91 | 1797 | 25  | 1842 | 15  | 1892 | 13 | <b>95</b>  |
| N1-136 | 141281 | 414  | 39  | 0.07 | 1049  | 0.06156 | 11.0 | 1.15378  | 11.0 | 0.13593 | 1.1 | 0.99 | 385  | 41  | 779  | 62  | 2176 | 20 | 18         |
| N1-137 | 311714 | 305  | 111 | 0.31 | 3458  | 0.32255 | 21.8 | 7.79063  | 21.8 | 0.17517 | 0.8 | 1.00 | 1802 | 352 | 2207 | 218 | 2608 | 13 | 69         |
| N1-138 | 123902 | 230  | 83  | 0.62 | 3546  | 0.32694 | 1.8  | 5.26318  | 2.0  | 0.11676 | 0.9 | 0.89 | 1824 | 29  | 1863 | 18  | 1907 | 17 | <b>96</b>  |
| N1-139 | 128067 | 193  | 43  | 0.53 | 1436  | 0.18455 | 2.2  | 2.80906  | 2.4  | 0.11039 | 1.0 | 0.90 | 1092 | 22  | 1358 | 18  | 1806 | 19 | 60         |
| N1-140 | 235478 | 389  | 61  | 0.17 | 678   | 0.12289 | 3.7  | 2.48205  | 3.8  | 0.14648 | 1.2 | 0.95 | 747  | 26  | 1267 | 28  | 2305 | 20 | 32         |
| N1-141 | 111193 | 112  | 46  | 0.38 | 3656  | 0.37888 | 1.6  | 7.03162  | 1.8  | 0.13460 | 0.7 | 0.93 | 2071 | 29  | 2115 | 16  | 2159 | 12 | <b>96</b>  |
| N1-142 | 92381  | 89   | 40  | 0.54 | 71937 | 0.38766 | 1.6  | 6.94830  | 1.7  | 0.13000 | 0.7 | 0.92 | 2112 | 28  | 2105 | 15  | 2098 | 12 | <b>101</b> |
| N1-143 | 78255  | 114  | 41  | 0.76 | 15175 | 0.30129 | 2.0  | 5.18889  | 2.2  | 0.12491 | 0.8 | 0.93 | 1698 | 31  | 1851 | 19  | 2027 | 15 | 84         |
| N1-144 | 88882  | 134  | 38  | 0.90 | 3539  | 0.24283 | 2.4  | 5.28535  | 2.6  | 0.15786 | 0.8 | 0.95 | 1401 | 31  | 1866 | 22  | 2433 | 13 | 58         |
| N1-145 | 140766 | 2562 | 68  | 0.04 | 420   | 0.02137 | 3.0  | 0.37087  | 3.1  | 0.12588 | 0.9 | 0.95 | 136  | 4   | 320  | 9   | 2041 | 17 | 7          |
| N1-146 | 162594 | 562  | 94  | 0.06 | 718   | 0.14210 | 3.4  | 2.52074  | 3.5  | 0.12866 | 0.8 | 0.98 | 857  | 28  | 1278 | 26  | 2080 | 14 | 41         |
| N1-147 | 235409 | 426  | 102 | 0.14 | 1107  | 0.21879 | 2.8  | 3.81600  | 2.8  | 0.12650 | 0.6 | 0.98 | 1275 | 32  | 1596 | 23  | 2050 | 11 | 62         |
| N1-148 | 230009 | 461  | 94  | 0.06 | 325   | 0.14374 | 2.0  | 2.93764  | 2.1  | 0.14823 | 0.8 | 0.93 | 866  | 16  | 1392 | 16  | 2326 | 13 | 37         |
| N1-149 | 121728 | 287  | 59  | 0.26 | 2181  | 0.17632 | 3.7  | 2.84261  | 3.8  | 0.11693 | 0.7 | 0.98 | 1047 | 36  | 1367 | 29  | 1910 | 12 | 55         |
| N1-150 | 108436 | 135  | 57  | 0.63 | 38185 | 0.36589 | 1.5  | 6.21444  | 1.8  | 0.12318 | 0.9 | 0.86 | 2010 | 26  | 2006 | 16  | 2003 | 16 | <b>100</b> |
| N1-151 | 128265 | 174  | 69  | 0.46 | 5632  | 0.37642 | 3.8  | 6.69780  | 3.9  | 0.12905 | 0.5 | 0.99 | 2060 | 68  | 2072 | 35  | 2085 | 10 | <b>99</b>  |
| N1-152 | 166817 | 250  | 90  | 0.59 | 2269  | 0.32396 | 1.8  | 6.93607  | 2.0  | 0.15528 | 0.9 | 0.88 | 1809 | 28  | 2103 | 18  | 2405 | 16 | 75         |
| N1-153 | 126448 | 147  | 55  | 0.36 | 10514 | 0.34793 | 1.7  | 6.08189  | 1.9  | 0.12678 | 1.0 | 0.85 | 1925 | 28  | 1988 | 17  | 2054 | 18 | <b>94</b>  |
| N1-154 | 168044 | 157  | 65  | 0.49 | 2471  | 0.35423 | 1.7  | 6.54806  | 1.9  | 0.13407 | 0.8 | 0.91 | 1955 | 29  | 2052 | 17  | 2152 | 14 | <b>91</b>  |
| N1-155 | 51514  | 127  | 22  | 0.62 | 7958  | 0.15003 | 4.6  | 2.51732  | 4.7  | 0.12169 | 1.3 | 0.96 | 901  | 38  | 1277 | 35  | 1981 | 23 | 45         |
| N1-156 | 191106 | 1455 | 91  | 0.05 | 263   | 0.04772 | 3.2  | 0.96750  | 3.3  | 0.14705 | 0.8 | 0.97 | 300  | 9   | 687  | 17  | 2312 | 14 | 13         |
| N1-157 | 119921 | 429  | 50  | 0.07 | 1218  | 0.10561 | 2.7  | 1.69894  | 2.8  | 0.11668 | 0.8 | 0.96 | 647  | 17  | 1008 | 18  | 1906 | 15 | 34         |
| N1-158 | 386176 | 250  | 123 | 0.58 | 3304  | 0.43100 | 1.9  | 13.30923 | 2.0  | 0.22396 | 0.5 | 0.97 | 2310 | 37  | 2702 | 19  | 3009 | 8  | 77         |
| N1-159 | 34790  | 27   | 14  | 1.12 | 3057  | 0.37399 | 2.2  | 9.67360  | 2.6  | 0.18760 | 1.4 | 0.85 | 2048 | 39  | 2404 | 25  | 2721 | 23 | 75         |
| N1-160 | 178607 | 598  | 62  | 0.05 | 210   | 0.07439 | 4.6  | 1.74181  | 4.8  | 0.16982 | 1.2 | 0.97 | 463  | 21  | 1024 | 31  | 2556 | 21 | 18         |
| N1-161 | 198110 | 452  | 106 | 0.06 | 988   | 0.19367 | 3.7  | 3.24742  | 3.7  | 0.12161 | 0.6 | 0.99 | 1141 | 39  | 1469 | 29  | 1980 | 11 | 58         |
| N1-162 | 169979 | 384  | 17  | 0.13 | 1000  | 0.01898 | 31.1 | 0.37321  | 31.2 | 0.14263 | 1.1 | 1.00 | 121  | 37  | 322  | 90  | 2259 | 19 | 5          |
| N1-163 | 180583 | 461  | 71  | 0.09 | 1473  | 0.13446 | 4.6  | 2.49925  | 4.7  | 0.13481 | 0.8 | 0.99 | 813  | 35  | 1272 | 34  | 2162 | 14 | 38         |

|        |        |      |     |      |       |         |     |          |     |         |     |      |      |    |      |    |      |     |            |
|--------|--------|------|-----|------|-------|---------|-----|----------|-----|---------|-----|------|------|----|------|----|------|-----|------------|
| N2-001 | 240862 | 389  | 97  | 0.18 | 904   | 0.19918 | 2.9 | 3.72583  | 3.0 | 0.13567 | 0.5 | 0.99 | 1171 | 31 | 1577 | 24 | 2173 | 8   | 54         |
| N2-002 | 242243 | 303  | 83  | 0.20 | 1252  | 0.24874 | 2.8 | 4.65769  | 2.8 | 0.13581 | 0.4 | 0.99 | 1432 | 36 | 1760 | 24 | 2174 | 8   | 66         |
| N2-003 | 251048 | 214  | 92  | 0.29 | 56567 | 0.39403 | 2.4 | 7.23358  | 2.5 | 0.13314 | 0.5 | 0.98 | 2141 | 45 | 2141 | 23 | 2140 | 9   | <b>100</b> |
| N2-004 | 537167 | 5451 | 261 | 0.02 | 6017  | 0.02318 | 2.2 | 0.77040  | 9.5 | 0.24103 | 9.3 | 0.23 | 148  | 3  | 580  | 43 | 3127 | 148 | 5          |
| N2-005 | 195956 | 460  | 98  | 0.07 | 3346  | 0.20077 | 3.1 | 4.12945  | 3.2 | 0.14917 | 0.7 | 0.97 | 1179 | 34 | 1660 | 26 | 2336 | 12  | 50         |
| N2-006 | 179903 | 334  | 83  | 0.23 | 2052  | 0.20318 | 3.8 | 3.40771  | 3.9 | 0.12164 | 0.8 | 0.98 | 1192 | 42 | 1506 | 31 | 1980 | 14  | 60         |
| N2-007 | 99705  | 130  | 48  | 0.38 | 85654 | 0.34093 | 2.2 | 5.54203  | 2.4 | 0.11790 | 1.0 | 0.91 | 1891 | 36 | 1907 | 21 | 1925 | 18  | <b>98</b>  |
| N2-008 | 194093 | 402  | 47  | 0.20 | 822   | 0.08906 | 2.5 | 1.64277  | 2.6 | 0.13379 | 0.8 | 0.96 | 550  | 13 | 987  | 17 | 2148 | 13  | 26         |
| N2-009 | 244374 | 2083 | 124 | 0.04 | 831   | 0.05376 | 2.8 | 0.92249  | 2.9 | 0.12446 | 0.7 | 0.97 | 338  | 9  | 664  | 14 | 2021 | 13  | 17         |
| N2-010 | 65239  | 64   | 29  | 0.53 | 8502  | 0.38423 | 2.2 | 7.04473  | 2.5 | 0.13298 | 1.0 | 0.91 | 2096 | 40 | 2117 | 22 | 2138 | 18  | <b>98</b>  |
| N2-011 | 141364 | 105  | 51  | 0.21 | 24581 | 0.45829 | 2.3 | 9.91452  | 2.4 | 0.15690 | 0.5 | 0.98 | 2432 | 47 | 2427 | 22 | 2423 | 9   | <b>100</b> |
| N2-012 | 118439 | 97   | 51  | 0.42 | 73360 | 0.46848 | 3.4 | 10.55766 | 3.5 | 0.16344 | 0.8 | 0.97 | 2477 | 71 | 2485 | 33 | 2492 | 14  | <b>99</b>  |
| N2-013 | 173946 | 1104 | 28  | 0.05 | 1460  | 0.01588 | 5.8 | 0.28457  | 5.9 | 0.13001 | 0.7 | 0.99 | 102  | 6  | 254  | 13 | 2098 | 12  | 5          |
| N2-014 | 56764  | 51   | 23  | 0.31 | 17220 | 0.40754 | 2.0 | 7.82761  | 2.2 | 0.13930 | 1.0 | 0.90 | 2204 | 38 | 2211 | 20 | 2219 | 17  | <b>99</b>  |
| N2-015 | 229305 | 1293 | 90  | 0.03 | 378   | 0.05901 | 5.4 | 0.80928  | 5.6 | 0.09946 | 1.3 | 0.97 | 370  | 19 | 602  | 26 | 1614 | 25  | 23         |
| N2-016 | 120544 | 88   | 43  | 0.25 | 72119 | 0.44616 | 2.1 | 9.62695  | 2.3 | 0.15649 | 0.8 | 0.94 | 2378 | 42 | 2400 | 21 | 2418 | 13  | <b>98</b>  |
| N2-017 | 228499 | 345  | 74  | 0.16 | 1263  | 0.19855 | 3.9 | 3.64010  | 4.1 | 0.13297 | 1.2 | 0.96 | 1168 | 42 | 1558 | 33 | 2138 | 20  | 55         |
| N2-018 | 274450 | 410  | 110 | 0.22 | 660   | 0.23901 | 2.5 | 4.80643  | 2.6 | 0.14585 | 0.7 | 0.96 | 1382 | 31 | 1786 | 22 | 2298 | 12  | 60         |
| N2-019 | 175352 | 425  | 40  | 0.18 | 2867  | 0.07811 | 4.8 | 1.37162  | 4.9 | 0.12736 | 0.9 | 0.98 | 485  | 22 | 877  | 29 | 2062 | 16  | 24         |
| N2-020 | 74891  | 83   | 39  | 0.82 | 20359 | 0.36964 | 2.2 | 6.60369  | 2.3 | 0.12957 | 0.8 | 0.94 | 2028 | 38 | 2060 | 21 | 2092 | 13  | <b>97</b>  |
| N2-021 | 113381 | 137  | 65  | 0.72 | 3696  | 0.39518 | 2.6 | 7.32677  | 2.9 | 0.13447 | 1.3 | 0.89 | 2147 | 47 | 2152 | 26 | 2157 | 23  | <b>100</b> |
| N2-022 | 156512 | 296  | 60  | 0.40 | 1041  | 0.16272 | 4.4 | 2.96778  | 4.6 | 0.13228 | 1.3 | 0.96 | 972  | 40 | 1399 | 36 | 2128 | 22  | 46         |
| N2-023 | 136222 | 312  | 94  | 0.22 | 1873  | 0.25832 | 2.6 | 5.01211  | 2.7 | 0.14072 | 0.8 | 0.96 | 1481 | 34 | 1821 | 23 | 2236 | 14  | 66         |
| N2-024 | 156558 | 237  | 49  | 0.49 | 367   | 0.13316 | 3.4 | 2.31502  | 3.7 | 0.12609 | 1.5 | 0.92 | 806  | 26 | 1217 | 27 | 2044 | 26  | 39         |
| N2-025 | 133220 | 122  | 56  | 0.53 | 33878 | 0.38607 | 2.0 | 7.26957  | 2.2 | 0.13656 | 0.7 | 0.94 | 2105 | 37 | 2145 | 19 | 2184 | 13  | <b>96</b>  |
| N2-026 | 187803 | 495  | 103 | 0.07 | 1157  | 0.19061 | 2.7 | 3.24974  | 2.7 | 0.12365 | 0.5 | 0.98 | 1125 | 27 | 1469 | 21 | 2010 | 10  | 56         |
| N2-027 | 226101 | 226  | 87  | 0.16 | 16046 | 0.37004 | 2.1 | 6.79144  | 2.2 | 0.13311 | 0.5 | 0.97 | 2030 | 37 | 2085 | 20 | 2139 | 9   | <b>95</b>  |
| N2-028 | 170033 | 334  | 79  | 0.39 | 2409  | 0.23324 | 2.8 | 4.12433  | 2.9 | 0.12825 | 0.6 | 0.98 | 1351 | 35 | 1659 | 24 | 2074 | 10  | 65         |
| N2-029 | 157332 | 274  | 90  | 0.49 | 4411  | 0.31210 | 2.8 | 5.66107  | 3.0 | 0.13156 | 1.0 | 0.95 | 1751 | 43 | 1925 | 26 | 2119 | 17  | 83         |
| N2-030 | 223212 | 401  | 97  | 0.28 | 4974  | 0.23912 | 2.7 | 4.07583  | 2.8 | 0.12362 | 0.7 | 0.97 | 1382 | 34 | 1649 | 23 | 2009 | 13  | 69         |
| N2-031 | 386660 | 272  | 147 | 0.19 | 897   | 0.50272 | 2.9 | 9.75579  | 3.0 | 0.14075 | 0.9 | 0.95 | 2625 | 63 | 2412 | 28 | 2236 | 16  | 117        |
| N2-032 | 54372  | 119  | 24  | 0.36 | 38390 | 0.18705 | 4.6 | 3.70067  | 4.7 | 0.14349 | 1.0 | 0.98 | 1105 | 47 | 1572 | 38 | 2270 | 18  | 49         |

|        |         |      |     |      |        |         |     |          |     |         |     |      |      |    |      |    |      |    |            |
|--------|---------|------|-----|------|--------|---------|-----|----------|-----|---------|-----|------|------|----|------|----|------|----|------------|
| N2-033 | 188673  | 224  | 73  | 0.29 | 2812   | 0.29354 | 2.9 | 4.92645  | 3.0 | 0.12172 | 1.0 | 0.94 | 1659 | 42 | 1807 | 26 | 1982 | 18 | 84         |
| N2-034 | 132241  | 147  | 55  | 0.22 | 4611   | 0.35244 | 2.4 | 6.25216  | 2.5 | 0.12866 | 0.6 | 0.97 | 1946 | 41 | 2012 | 22 | 2080 | 11 | <b>94</b>  |
| N2-035 | 205481  | 274  | 89  | 0.46 | 2434   | 0.28419 | 3.4 | 5.04987  | 3.5 | 0.12888 | 0.4 | 0.99 | 1612 | 49 | 1828 | 30 | 2083 | 8  | 77         |
| N2-036 | 203173  | 433  | 82  | 0.23 | 525    | 0.15765 | 3.0 | 3.00485  | 3.1 | 0.13824 | 0.6 | 0.98 | 944  | 26 | 1409 | 24 | 2205 | 11 | 43         |
| N2-037 | 202280  | 195  | 79  | 0.28 | 6732   | 0.36942 | 2.1 | 7.02823  | 2.2 | 0.13798 | 0.6 | 0.96 | 2027 | 36 | 2115 | 19 | 2202 | 10 | <b>92</b>  |
| N2-038 | 329739  | 202  | 95  | 0.33 | 2270   | 0.40695 | 2.1 | 12.39851 | 2.3 | 0.22097 | 0.9 | 0.92 | 2201 | 40 | 2635 | 22 | 2988 | 15 | 74         |
| N2-039 | 270982  | 246  | 127 | 0.65 | 5078   | 0.43329 | 2.4 | 8.80716  | 2.5 | 0.14742 | 0.6 | 0.97 | 2321 | 47 | 2318 | 23 | 2316 | 10 | <b>100</b> |
| N2-040 | 184725  | 572  | 120 | 0.05 | 1762   | 0.18417 | 2.3 | 2.93686  | 2.5 | 0.11566 | 0.9 | 0.93 | 1090 | 23 | 1391 | 19 | 1890 | 16 | 58         |
| N2-041 | 131144  | 140  | 59  | 0.49 | 6866   | 0.36920 | 2.7 | 6.74663  | 2.8 | 0.13253 | 0.5 | 0.99 | 2026 | 48 | 2079 | 25 | 2132 | 8  | <b>95</b>  |
| N2-042 | 68447   | 62   | 28  | 0.28 | 50526  | 0.41095 | 2.0 | 7.77925  | 2.2 | 0.13729 | 0.9 | 0.91 | 2219 | 38 | 2206 | 20 | 2193 | 16 | <b>101</b> |
| N2-043 | 252586  | 744  | 112 | 0.13 | 829    | 0.13835 | 2.4 | 2.32312  | 2.5 | 0.12178 | 0.7 | 0.95 | 835  | 19 | 1219 | 18 | 1982 | 13 | 42         |
| N2-044 | 1896678 | 1316 | 172 | 0.02 | 747    | 0.02986 | 2.4 | 9.68026  | 4.9 | 2.35161 | 4.3 | 0.49 | 190  | 4  | 2405 | 46 | 6414 | 57 | 3          |
| N2-045 | 167882  | 159  | 77  | 0.65 | 126222 | 0.39697 | 2.0 | 7.37834  | 2.2 | 0.13480 | 0.8 | 0.93 | 2155 | 37 | 2158 | 20 | 2161 | 14 | <b>100</b> |
| N2-046 | 103670  | 143  | 45  | 0.51 | 4339   | 0.27980 | 3.3 | 5.32258  | 3.4 | 0.13797 | 0.8 | 0.97 | 1590 | 46 | 1872 | 29 | 2202 | 14 | 72         |
| N2-047 | 240025  | 660  | 116 | 0.12 | 354    | 0.15906 | 3.8 | 2.97108  | 4.0 | 0.13547 | 1.2 | 0.95 | 952  | 34 | 1400 | 31 | 2170 | 22 | 44         |
| N2-048 | 244814  | 298  | 97  | 0.34 | 3223   | 0.29224 | 2.2 | 5.35898  | 2.2 | 0.13300 | 0.6 | 0.96 | 1653 | 32 | 1878 | 19 | 2138 | 10 | 77         |
| N2-049 | 172901  | 248  | 97  | 0.57 | 5066   | 0.36361 | 2.2 | 6.53761  | 2.5 | 0.13040 | 1.1 | 0.90 | 1999 | 39 | 2051 | 22 | 2103 | 19 | <b>95</b>  |
| N2-050 | 144342  | 176  | 60  | 0.31 | 12793  | 0.30848 | 2.3 | 5.40385  | 2.4 | 0.12705 | 0.9 | 0.93 | 1733 | 35 | 1885 | 21 | 2058 | 15 | 84         |
| N2-051 | 261074  | 484  | 131 | 0.28 | 707    | 0.24446 | 3.2 | 4.50692  | 3.3 | 0.13371 | 0.7 | 0.97 | 1410 | 41 | 1732 | 28 | 2147 | 13 | 66         |
| N2-052 | 243574  | 395  | 105 | 0.23 | 1727   | 0.24794 | 2.1 | 4.18769  | 2.2 | 0.12250 | 0.6 | 0.96 | 1428 | 27 | 1672 | 18 | 1993 | 11 | 72         |
| N2-053 | 409242  | 339  | 183 | 0.43 | 3520   | 0.48596 | 3.2 | 11.60294 | 3.3 | 0.17317 | 0.6 | 0.98 | 2553 | 68 | 2573 | 31 | 2588 | 10 | <b>99</b>  |
| N2-054 | 141526  | 133  | 60  | 0.33 | 37819  | 0.40592 | 2.0 | 7.62001  | 2.1 | 0.13615 | 0.6 | 0.96 | 2196 | 38 | 2187 | 19 | 2179 | 10 | <b>101</b> |
| N2-055 | 68831   | 54   | 29  | 0.70 | 32497  | 0.43118 | 2.2 | 8.75634  | 2.4 | 0.14729 | 1.1 | 0.89 | 2311 | 42 | 2313 | 22 | 2315 | 19 | <b>100</b> |
| N2-056 | 342029  | 442  | 181 | 0.03 | 3380   | 0.41181 | 2.4 | 6.98937  | 2.6 | 0.12309 | 1.2 | 0.89 | 2223 | 45 | 2110 | 24 | 2002 | 21 | 111        |
| N2-057 | 58393   | 50   | 25  | 0.53 | 18612  | 0.42869 | 2.0 | 9.28313  | 2.2 | 0.15705 | 0.8 | 0.93 | 2300 | 39 | 2366 | 20 | 2424 | 14 | <b>95</b>  |
| N2-058 | 95946   | 109  | 48  | 0.46 | 21932  | 0.38405 | 2.7 | 7.00663  | 2.8 | 0.13232 | 0.8 | 0.95 | 2095 | 49 | 2112 | 26 | 2129 | 15 | <b>98</b>  |
| N2-059 | 68255   | 111  | 36  | 0.75 | 13148  | 0.28286 | 2.8 | 5.32269  | 3.0 | 0.13648 | 1.0 | 0.95 | 1606 | 40 | 1873 | 26 | 2183 | 17 | 74         |
| N2-060 | 160738  | 368  | 41  | 0.25 | 1004   | 0.08756 | 4.1 | 1.45742  | 4.2 | 0.12071 | 0.9 | 0.98 | 541  | 21 | 913  | 25 | 1967 | 16 | 28         |
| N2-061 | 497526  | 396  | 147 | 0.15 | 3708   | 0.35108 | 2.6 | 5.80715  | 2.9 | 0.11996 | 1.2 | 0.91 | 1940 | 44 | 1947 | 25 | 1956 | 22 | <b>99</b>  |
| N2-062 | 117843  | 136  | 46  | 0.39 | 6607   | 0.29135 | 2.5 | 5.27776  | 2.6 | 0.13138 | 0.7 | 0.96 | 1648 | 37 | 1865 | 23 | 2117 | 13 | 78         |
| N2-063 | 158050  | 302  | 93  | 0.48 | 2849   | 0.28320 | 3.2 | 4.77650  | 3.3 | 0.12233 | 0.8 | 0.97 | 1607 | 45 | 1781 | 28 | 1990 | 14 | 81         |
| N2-064 | 221685  | 412  | 77  | 0.28 | 1011   | 0.16675 | 5.6 | 3.01975  | 5.7 | 0.13135 | 0.8 | 0.99 | 994  | 52 | 1413 | 44 | 2116 | 14 | 47         |
| N2-065 | 213768  | 1104 | 118 | 0.04 | 592    | 0.09449 | 2.8 | 1.40082  | 2.9 | 0.10752 | 0.7 | 0.97 | 582  | 16 | 889  | 18 | 1758 | 13 | 33         |

|        |        |      |     |      |       |         |      |          |      |         |     |      |      |    |      |    |      |    |            |
|--------|--------|------|-----|------|-------|---------|------|----------|------|---------|-----|------|------|----|------|----|------|----|------------|
| N2-066 | 184455 | 432  | 86  | 0.37 | 418   | 0.16641 | 2.8  | 3.06354  | 2.9  | 0.13352 | 0.7 | 0.97 | 992  | 26 | 1424 | 22 | 2145 | 13 | 46         |
| N2-067 | 45476  | 48   | 22  | 0.42 | 32336 | 0.40239 | 2.0  | 7.51430  | 2.3  | 0.13544 | 1.2 | 0.86 | 2180 | 37 | 2175 | 21 | 2170 | 21 | <b>100</b> |
| N2-068 | 105117 | 130  | 52  | 0.56 | 9744  | 0.34211 | 2.1  | 6.11003  | 2.2  | 0.12953 | 0.8 | 0.94 | 1897 | 34 | 1992 | 19 | 2092 | 13 | <b>91</b>  |
| N2-069 | 80635  | 119  | 48  | 0.24 | 8010  | 0.38332 | 2.9  | 6.92939  | 3.0  | 0.13111 | 0.9 | 0.96 | 2092 | 52 | 2102 | 27 | 2113 | 15 | <b>99</b>  |
| N2-070 | 157902 | 123  | 30  | 0.39 | 4099  | 0.17419 | 2.8  | 4.28007  | 3.0  | 0.17820 | 1.1 | 0.93 | 1035 | 27 | 1690 | 25 | 2636 | 19 | 39         |
| N2-071 | 162530 | 484  | 100 | 0.08 | 1964  | 0.18132 | 4.1  | 3.83110  | 4.2  | 0.15324 | 0.8 | 0.98 | 1074 | 41 | 1599 | 34 | 2382 | 14 | 45         |
| N2-072 | 171748 | 245  | 49  | 0.29 | 1557  | 0.17153 | 5.3  | 3.08250  | 5.4  | 0.13034 | 1.0 | 0.98 | 1021 | 50 | 1428 | 42 | 2102 | 18 | 49         |
| N2-073 | 181936 | 275  | 78  | 0.25 | 1550  | 0.25492 | 2.5  | 4.52727  | 2.6  | 0.12880 | 0.7 | 0.97 | 1464 | 33 | 1736 | 22 | 2082 | 12 | 70         |
| N2-074 | 171377 | 263  | 69  | 0.54 | 10670 | 0.23142 | 4.0  | 4.09446  | 4.1  | 0.12832 | 0.9 | 0.97 | 1342 | 48 | 1653 | 34 | 2075 | 16 | 65         |
| N2-075 | 128738 | 426  | 29  | 0.24 | 2117  | 0.05208 | 13.4 | 0.94775  | 13.5 | 0.13199 | 1.3 | 1.00 | 327  | 43 | 677  | 69 | 2125 | 23 | 15         |
| N2-076 | 202295 | 1069 | 93  | 0.05 | 902   | 0.07371 | 6.2  | 1.30430  | 6.2  | 0.12833 | 0.8 | 0.99 | 458  | 27 | 848  | 36 | 2075 | 15 | 22         |
| N2-077 | 121397 | 185  | 55  | 0.48 | 2844  | 0.26639 | 2.8  | 4.92034  | 2.8  | 0.13396 | 0.7 | 0.97 | 1522 | 38 | 1806 | 24 | 2150 | 12 | 71         |
| N2-078 | 194220 | 301  | 119 | 0.22 | 1682  | 0.37875 | 3.5  | 6.90362  | 3.6  | 0.13220 | 0.9 | 0.97 | 2070 | 62 | 2099 | 32 | 2127 | 17 | <b>97</b>  |
| N2-079 | 204710 | 341  | 95  | 0.37 | 1076  | 0.24705 | 3.3  | 4.40040  | 3.4  | 0.12919 | 0.8 | 0.97 | 1423 | 42 | 1712 | 28 | 2087 | 14 | 68         |
| N2-080 | 232985 | 1270 | 131 | 0.04 | 513   | 0.08531 | 3.2  | 1.49908  | 3.4  | 0.12745 | 1.0 | 0.95 | 528  | 16 | 930  | 21 | 2063 | 18 | 26         |
| N2-081 | 175416 | 199  | 66  | 0.40 | 3237  | 0.29171 | 2.5  | 5.42563  | 2.6  | 0.13489 | 0.9 | 0.94 | 1650 | 36 | 1889 | 23 | 2163 | 15 | 76         |
| N2-082 | -      | -    | -   | -    | -     | -       | -    | -        | -    | -       | -   | -    | -    | -  | -    | -  | -    | -  | -          |
| N2-083 | 198552 | 1861 | 94  | 0.03 | 639   | 0.04699 | 5.8  | 0.65527  | 5.9  | 0.10114 | 1.1 | 0.98 | 296  | 17 | 512  | 24 | 1645 | 21 | 18         |
| N2-084 | 202475 | 427  | 82  | 0.26 | 2535  | 0.17377 | 3.3  | 3.16183  | 3.4  | 0.13197 | 1.0 | 0.96 | 1033 | 31 | 1448 | 27 | 2124 | 17 | 49         |
| N2-085 | 280811 | 745  | 178 | 0.10 | 1176  | 0.22829 | 3.4  | 3.77660  | 3.5  | 0.11998 | 0.7 | 0.98 | 1326 | 41 | 1588 | 28 | 1956 | 12 | 68         |
| N2-086 | 206451 | 359  | 72  | 0.31 | 3526  | 0.18390 | 9.8  | 3.29472  | 9.8  | 0.12994 | 0.7 | 1.00 | 1088 | 98 | 1480 | 79 | 2097 | 13 | 52         |
| N2-087 | 126625 | 115  | 63  | 0.83 | 88297 | 0.42856 | 2.1  | 8.56673  | 2.2  | 0.14498 | 0.8 | 0.93 | 2299 | 40 | 2293 | 20 | 2288 | 14 | <b>101</b> |
| N2-088 | 190945 | 144  | 84  | 0.34 | 13680 | 0.54067 | 2.2  | 10.42725 | 2.4  | 0.13987 | 1.0 | 0.91 | 2786 | 49 | 2473 | 22 | 2226 | 17 | 125        |
| N2-089 | 149847 | 174  | 73  | 0.36 | 20569 | 0.38144 | 2.0  | 7.11680  | 2.1  | 0.13532 | 0.7 | 0.95 | 2083 | 36 | 2126 | 19 | 2168 | 12 | <b>96</b>  |
| N2-090 | 219974 | 1153 | 108 | 0.03 | 541   | 0.08391 | 3.7  | 1.40417  | 3.9  | 0.12137 | 1.1 | 0.96 | 519  | 19 | 891  | 23 | 1977 | 19 | 26         |
| N2-091 | 121066 | 155  | 42  | 0.53 | 1972  | 0.21670 | 3.5  | 3.92916  | 3.7  | 0.13151 | 1.0 | 0.97 | 1264 | 41 | 1620 | 30 | 2118 | 17 | 60         |
| N2-092 | 168151 | 2841 | 53  | 0.03 | 568   | 0.01528 | 4.3  | 0.26239  | 4.6  | 0.12451 | 1.4 | 0.95 | 98   | 4  | 237  | 10 | 2022 | 26 | 5          |
| N2-093 | 55870  | 90   | 15  | 0.45 | 7936  | 0.12993 | 2.6  | 2.34041  | 2.9  | 0.13064 | 1.2 | 0.90 | 787  | 19 | 1225 | 20 | 2107 | 22 | 37         |
| N2-094 | 64610  | 67   | 30  | 0.51 | 5053  | 0.38105 | 2.3  | 6.96488  | 2.5  | 0.13257 | 0.9 | 0.93 | 2081 | 41 | 2107 | 22 | 2132 | 16 | <b>98</b>  |
| N2-095 | 238083 | 847  | 110 | 0.04 | 725   | 0.11065 | 5.8  | 2.08303  | 5.8  | 0.13654 | 0.9 | 0.99 | 677  | 37 | 1143 | 41 | 2184 | 16 | 31         |
| N2-096 | 179842 | 396  | 97  | 0.42 | 1042  | 0.20963 | 3.1  | 3.76890  | 3.2  | 0.13039 | 0.8 | 0.97 | 1227 | 34 | 1586 | 26 | 2103 | 14 | 58         |
| N2-097 | 182011 | 184  | 80  | 0.47 | 13699 | 0.38966 | 2.5  | 8.02653  | 2.5  | 0.14940 | 0.5 | 0.98 | 2121 | 45 | 2234 | 23 | 2339 | 9  | <b>91</b>  |
| N2-098 | 143124 | 879  | 79  | 0.05 | 715   | 0.07191 | 4.2  | 1.17772  | 4.3  | 0.11878 | 0.8 | 0.98 | 448  | 18 | 790  | 24 | 1938 | 15 | 23         |

|        |        |      |     |      |       |         |     |          |     |         |     |      |      |    |      |    |      |    |            |
|--------|--------|------|-----|------|-------|---------|-----|----------|-----|---------|-----|------|------|----|------|----|------|----|------------|
| N2-099 | 123244 | 135  | 59  | 0.41 | 95418 | 0.38642 | 2.1 | 6.96524  | 2.1 | 0.13073 | 0.6 | 0.96 | 2106 | 37 | 2107 | 19 | 2108 | 10 | <b>100</b> |
| N2-100 | 78908  | 79   | 40  | 0.64 | 31073 | 0.41917 | 2.1 | 8.13811  | 2.3 | 0.14081 | 0.9 | 0.93 | 2257 | 40 | 2246 | 21 | 2237 | 15 | <b>101</b> |
| N2-101 | 173318 | 2246 | 72  | 0.04 | 761   | 0.02822 | 6.5 | 0.50512  | 6.6 | 0.12983 | 1.0 | 0.99 | 179  | 12 | 415  | 23 | 2096 | 17 | 9          |
| N2-102 | 233582 | 591  | 93  | 0.24 | 774   | 0.13400 | 4.7 | 2.31034  | 4.8 | 0.12505 | 1.1 | 0.97 | 811  | 36 | 1215 | 35 | 2029 | 19 | 40         |
| N2-103 | 183365 | 1182 | 73  | 0.05 | 1922  | 0.05345 | 8.4 | 1.06294  | 8.5 | 0.14424 | 0.8 | 1.00 | 336  | 28 | 735  | 45 | 2279 | 14 | 15         |
| N2-104 | 139370 | 361  | 80  | 0.44 | 5849  | 0.20267 | 3.9 | 3.59374  | 4.0 | 0.12860 | 0.8 | 0.98 | 1190 | 42 | 1548 | 32 | 2079 | 14 | 57         |
| N2-105 | 141543 | 1352 | 63  | 0.07 | 781   | 0.03858 | 4.1 | 0.70098  | 4.2 | 0.13178 | 0.9 | 0.98 | 244  | 10 | 539  | 18 | 2122 | 15 | 12         |
| N2-106 | 179383 | 207  | 69  | 0.24 | 3929  | 0.31102 | 2.4 | 5.34944  | 2.6 | 0.12474 | 0.9 | 0.93 | 1746 | 37 | 1877 | 23 | 2025 | 16 | 86         |
| N2-107 | 235372 | 911  | 68  | 0.06 | 603   | 0.06493 | 4.1 | 1.20822  | 4.2 | 0.13496 | 0.7 | 0.99 | 406  | 16 | 804  | 23 | 2163 | 12 | 19         |
| N2-108 | 279834 | 580  | 96  | 0.17 | 601   | 0.14707 | 6.1 | 2.48196  | 6.1 | 0.12239 | 0.6 | 0.99 | 885  | 51 | 1267 | 45 | 1991 | 11 | 44         |
| N2-109 | 62734  | 110  | 22  | 0.57 | 4747  | 0.15883 | 4.5 | 2.87860  | 4.6 | 0.13145 | 1.1 | 0.97 | 950  | 40 | 1376 | 35 | 2117 | 19 | 45         |
| N2-110 | -      | -    | -   | -    | -     | -       | -   | -        | -   | -       | -   | -    | -    | -  | -    | -  | -    | -  | -          |
| N2-111 | 281977 | 665  | 125 | 0.12 | 702   | 0.17564 | 4.4 | 2.49098  | 6.0 | 0.10286 | 4.1 | 0.73 | 1043 | 42 | 1269 | 44 | 1676 | 76 | 62         |
| N2-112 | 272887 | 329  | 129 | 0.10 | 16664 | 0.38730 | 2.1 | 6.95341  | 2.2 | 0.13021 | 0.7 | 0.95 | 2110 | 37 | 2105 | 20 | 2101 | 12 | <b>100</b> |
| N2-113 | 158175 | 204  | 85  | 0.38 | 2353  | 0.26178 | 2.8 | 4.67317  | 2.9 | 0.12947 | 0.8 | 0.96 | 1499 | 38 | 1762 | 25 | 2091 | 15 | 72         |
| N2-114 | 157870 | 331  | 79  | 0.20 | 832   | 0.21132 | 2.7 | 3.21352  | 2.7 | 0.11029 | 0.6 | 0.98 | 1236 | 30 | 1460 | 21 | 1804 | 11 | 68         |
| N2-115 | 149353 | 689  | 61  | 0.08 | 1701  | 0.07386 | 4.4 | 1.14444  | 4.4 | 0.11238 | 0.6 | 0.99 | 459  | 20 | 775  | 24 | 1838 | 11 | 25         |
| N2-116 | 71949  | 77   | 36  | 0.57 | 53663 | 0.39287 | 2.2 | 7.35270  | 2.3 | 0.13574 | 0.7 | 0.95 | 2136 | 40 | 2155 | 21 | 2173 | 12 | <b>98</b>  |
| N2-117 | 106287 | 222  | 56  | 0.41 | 2694  | 0.23334 | 2.6 | 4.23321  | 2.7 | 0.13157 | 0.6 | 0.97 | 1352 | 32 | 1680 | 22 | 2119 | 11 | 64         |
| N2-118 | 202362 | 340  | 101 | 0.40 | 1779  | 0.26741 | 2.7 | 4.88245  | 2.7 | 0.13242 | 0.4 | 0.99 | 1528 | 36 | 1799 | 23 | 2130 | 7  | 72         |
| N2-119 | 139657 | 315  | 61  | 0.45 | 5488  | 0.17125 | 6.6 | 3.07867  | 6.7 | 0.13039 | 0.8 | 0.99 | 1019 | 63 | 1427 | 52 | 2103 | 14 | 48         |
| N2-120 | 242718 | 698  | 107 | 0.07 | 1328  | 0.14047 | 7.0 | 2.56097  | 7.1 | 0.13223 | 1.0 | 0.99 | 847  | 56 | 1290 | 53 | 2128 | 18 | 40         |
| N2-121 | 202401 | 324  | 116 | 0.38 | 1102  | 0.29446 | 2.2 | 5.46816  | 2.4 | 0.13468 | 0.9 | 0.92 | 1664 | 32 | 1896 | 21 | 2160 | 16 | 77         |
| N2-122 | 362148 | 941  | 160 | 0.13 | 527   | 0.15432 | 2.5 | 2.73045  | 2.8 | 0.12833 | 1.2 | 0.90 | 925  | 22 | 1337 | 21 | 2075 | 22 | 45         |
| N2-123 | 173935 | 248  | 97  | 0.35 | 10786 | 0.37203 | 2.7 | 6.64185  | 2.8 | 0.12948 | 0.8 | 0.96 | 2039 | 47 | 2065 | 25 | 2091 | 13 | <b>98</b>  |
| N2-124 | 153397 | 176  | 83  | 0.74 | 8152  | 0.40738 | 2.1 | 8.59064  | 2.4 | 0.15294 | 1.2 | 0.86 | 2203 | 39 | 2296 | 22 | 2379 | 21 | <b>93</b>  |
| N2-125 | 127853 | 216  | 56  | 0.29 | 2953  | 0.23081 | 3.6 | 4.14420  | 3.7 | 0.13022 | 0.9 | 0.97 | 1339 | 43 | 1663 | 31 | 2101 | 16 | 64         |
| N2-126 | 129600 | 191  | 66  | 0.33 | 26708 | 0.32561 | 2.4 | 5.14175  | 2.5 | 0.11453 | 0.5 | 0.98 | 1817 | 38 | 1843 | 21 | 1872 | 9  | <b>97</b>  |
| N2-127 | 161486 | 719  | 114 | 0.06 | 1447  | 0.14873 | 2.4 | 2.63896  | 2.7 | 0.12869 | 1.1 | 0.92 | 894  | 20 | 1312 | 20 | 2080 | 19 | 43         |
| N2-128 | 141639 | 163  | 67  | 0.31 | 7746  | 0.38038 | 2.4 | 7.01837  | 2.5 | 0.13382 | 0.7 | 0.96 | 2078 | 43 | 2114 | 23 | 2149 | 12 | <b>97</b>  |
| N2-129 | 522092 | 344  | 230 | 0.27 | 2642  | 0.60465 | 2.6 | 11.74002 | 2.7 | 0.14082 | 0.7 | 0.96 | 3049 | 64 | 2584 | 26 | 2237 | 13 | 136        |
| N2-130 | 250093 | 73   | 67  | 0.60 | 25591 | 0.69582 | 2.0 | 27.36220 | 2.1 | 0.28520 | 0.6 | 0.96 | 3405 | 53 | 3397 | 21 | 3392 | 9  | <b>100</b> |
| N2-131 | 80503  | 100  | 42  | 0.44 | 24080 | 0.37290 | 2.3 | 6.69695  | 2.4 | 0.13025 | 0.9 | 0.92 | 2043 | 40 | 2072 | 22 | 2101 | 17 | <b>97</b>  |

|        |         |      |     |      |       |         |      |         |      |         |     |      |      |    |      |    |      |     |           |
|--------|---------|------|-----|------|-------|---------|------|---------|------|---------|-----|------|------|----|------|----|------|-----|-----------|
| N2-132 | 1638578 | 2342 | 253 | 0.05 | 7183  | 0.01990 | 2.7  | 4.63416 | 5.9  | 1.68931 | 5.2 | 0.46 | 127  | 3  | 1755 | 51 | 5964 | 72  | 2         |
| N2-133 | 180425  | 300  | 110 | 0.34 | 8133  | 0.29279 | 2.8  | 4.49526 | 2.9  | 0.11135 | 0.5 | 0.99 | 1655 | 42 | 1730 | 24 | 1822 | 9   | <b>91</b> |
| N2-134 | 20275   | 1012 | 11  | 0.08 | 2665  | 0.00879 | 11.2 | 0.14944 | 13.1 | 0.12330 | 6.7 | 0.86 | 56   | 6  | 141  | 17 | 2004 | 120 | 3         |
| N2-135 | 186281  | 222  | 80  | 0.12 | 18819 | 0.35263 | 2.1  | 6.50254 | 2.3  | 0.13374 | 0.8 | 0.94 | 1947 | 36 | 2046 | 20 | 2148 | 14  | <b>91</b> |
| N2-136 | 4268437 | 5359 | 465 | 0.02 | 2511  | 0.02061 | 2.5  | 6.53030 | 2.9  | 2.29828 | 1.4 | 0.87 | 131  | 3  | 2050 | 26 | 6383 | 19  | 2         |
| N2-137 | 203710  | 1070 | 99  | 0.03 | 583   | 0.08053 | 5.6  | 1.46760 | 5.7  | 0.13217 | 1.2 | 0.98 | 499  | 27 | 917  | 35 | 2127 | 20  | 23        |
| N2-138 | 179937  | 413  | 13  | 0.23 | 3106  | 0.01411 | 20.1 | 0.26338 | 20.1 | 0.13539 | 0.8 | 1.00 | 90   | 18 | 237  | 43 | 2169 | 14  | 4         |
| N2-139 | 212350  | 811  | 118 | 0.04 | 1102  | 0.11903 | 3.4  | 2.13916 | 3.4  | 0.13034 | 0.7 | 0.98 | 725  | 23 | 1162 | 24 | 2103 | 13  | 34        |

<sup>a</sup> within-run background-corrected mean <sup>207</sup>Pb signal in counts per second

<sup>b</sup> U and Pb content and Th/U ratio were calculated relative to GJ-1 and are accurate to approximately 10%.

<sup>c</sup> corrected for background, mass bias, laser induced U-Pb fractionation and common Pb (if detectable, see analytical method) using Stacey & Kramers (1975) model Pb composition. <sup>207</sup>Pb/<sup>235</sup>U calculated using <sup>207</sup>Pb/<sup>206</sup>Pb/(<sup>238</sup>U/<sup>206</sup>Pb × 1/137.88). Errors are propagated by quadratic addition of within-run errors (2SE) and the reproducibility of GJ-1 (2SD).

<sup>d</sup> Rho is the error correlation defined as  $\text{err}^{206\text{Pb}/238\text{U}}/\text{err}^{207\text{Pb}/235\text{U}}$ .
